# Supplementary material for: Mechanism for microbial population collapse in a fluctuating resource environment
Source: PubMed Central journal article supplement (PMC5371734; doi:10.15252/msb.20167058), 2017-03-20

## **APPENDIX**

### **Mechanism for microbial population collapse in a fluctuating resource environment**

Serdar Turkarslan, Arjun V Raman, Anne W Thompson, Christina E Arens, Mark A Gillespie, Frederick von Netzer, Kristina L Hillesland, Sergey Stolyar, Adrian López García de Lomana, David J Reiss, Drew Gorman-Lewis, Grant M Zane, Jeffrey A Ranish, Judy D Wall, David A Stahl and Nitin S Baliga

#### **Appendix Table of Contents**

|                                              |                |
|----------------------------------------------|----------------|
| <b>Figure Legends: Appendix Figure S1-S2</b> | <b>Page 2</b>  |
| <b>Appendix Figure S1</b>                    | <b>Page 3</b>  |
| <b>Appendix Figure S2</b>                    | <b>Page 13</b> |

## Appendix Figure Legends

**Appendix Figure S1:** Change in abundance of selected Dv transcripts during experimental evolution of wild type and mutant co-cultures. Abundance for each transcript is represented as normalized read counts on the y-axis while conditions are listed on the x-axis.

**Appendix Figure S2:** Change in abundance ( $\log_2$ ) of selected Dv proteins during experimental evolution of wild type and mutant co-cultures. Protein abundances for each condition are listed as boxplots while trends are represented with a trend line.  $\log_2$ -fold changes between ST1 and SR3 were calculated by Student's t-test or Mann–Whitney U test depending on normality of observed values; normality assessed by Shapiro–Wilk normality test. \* indicates p-value < 0.05 or \*\* indicates p-value < 0.01. Essential gene names are indicated with red font.

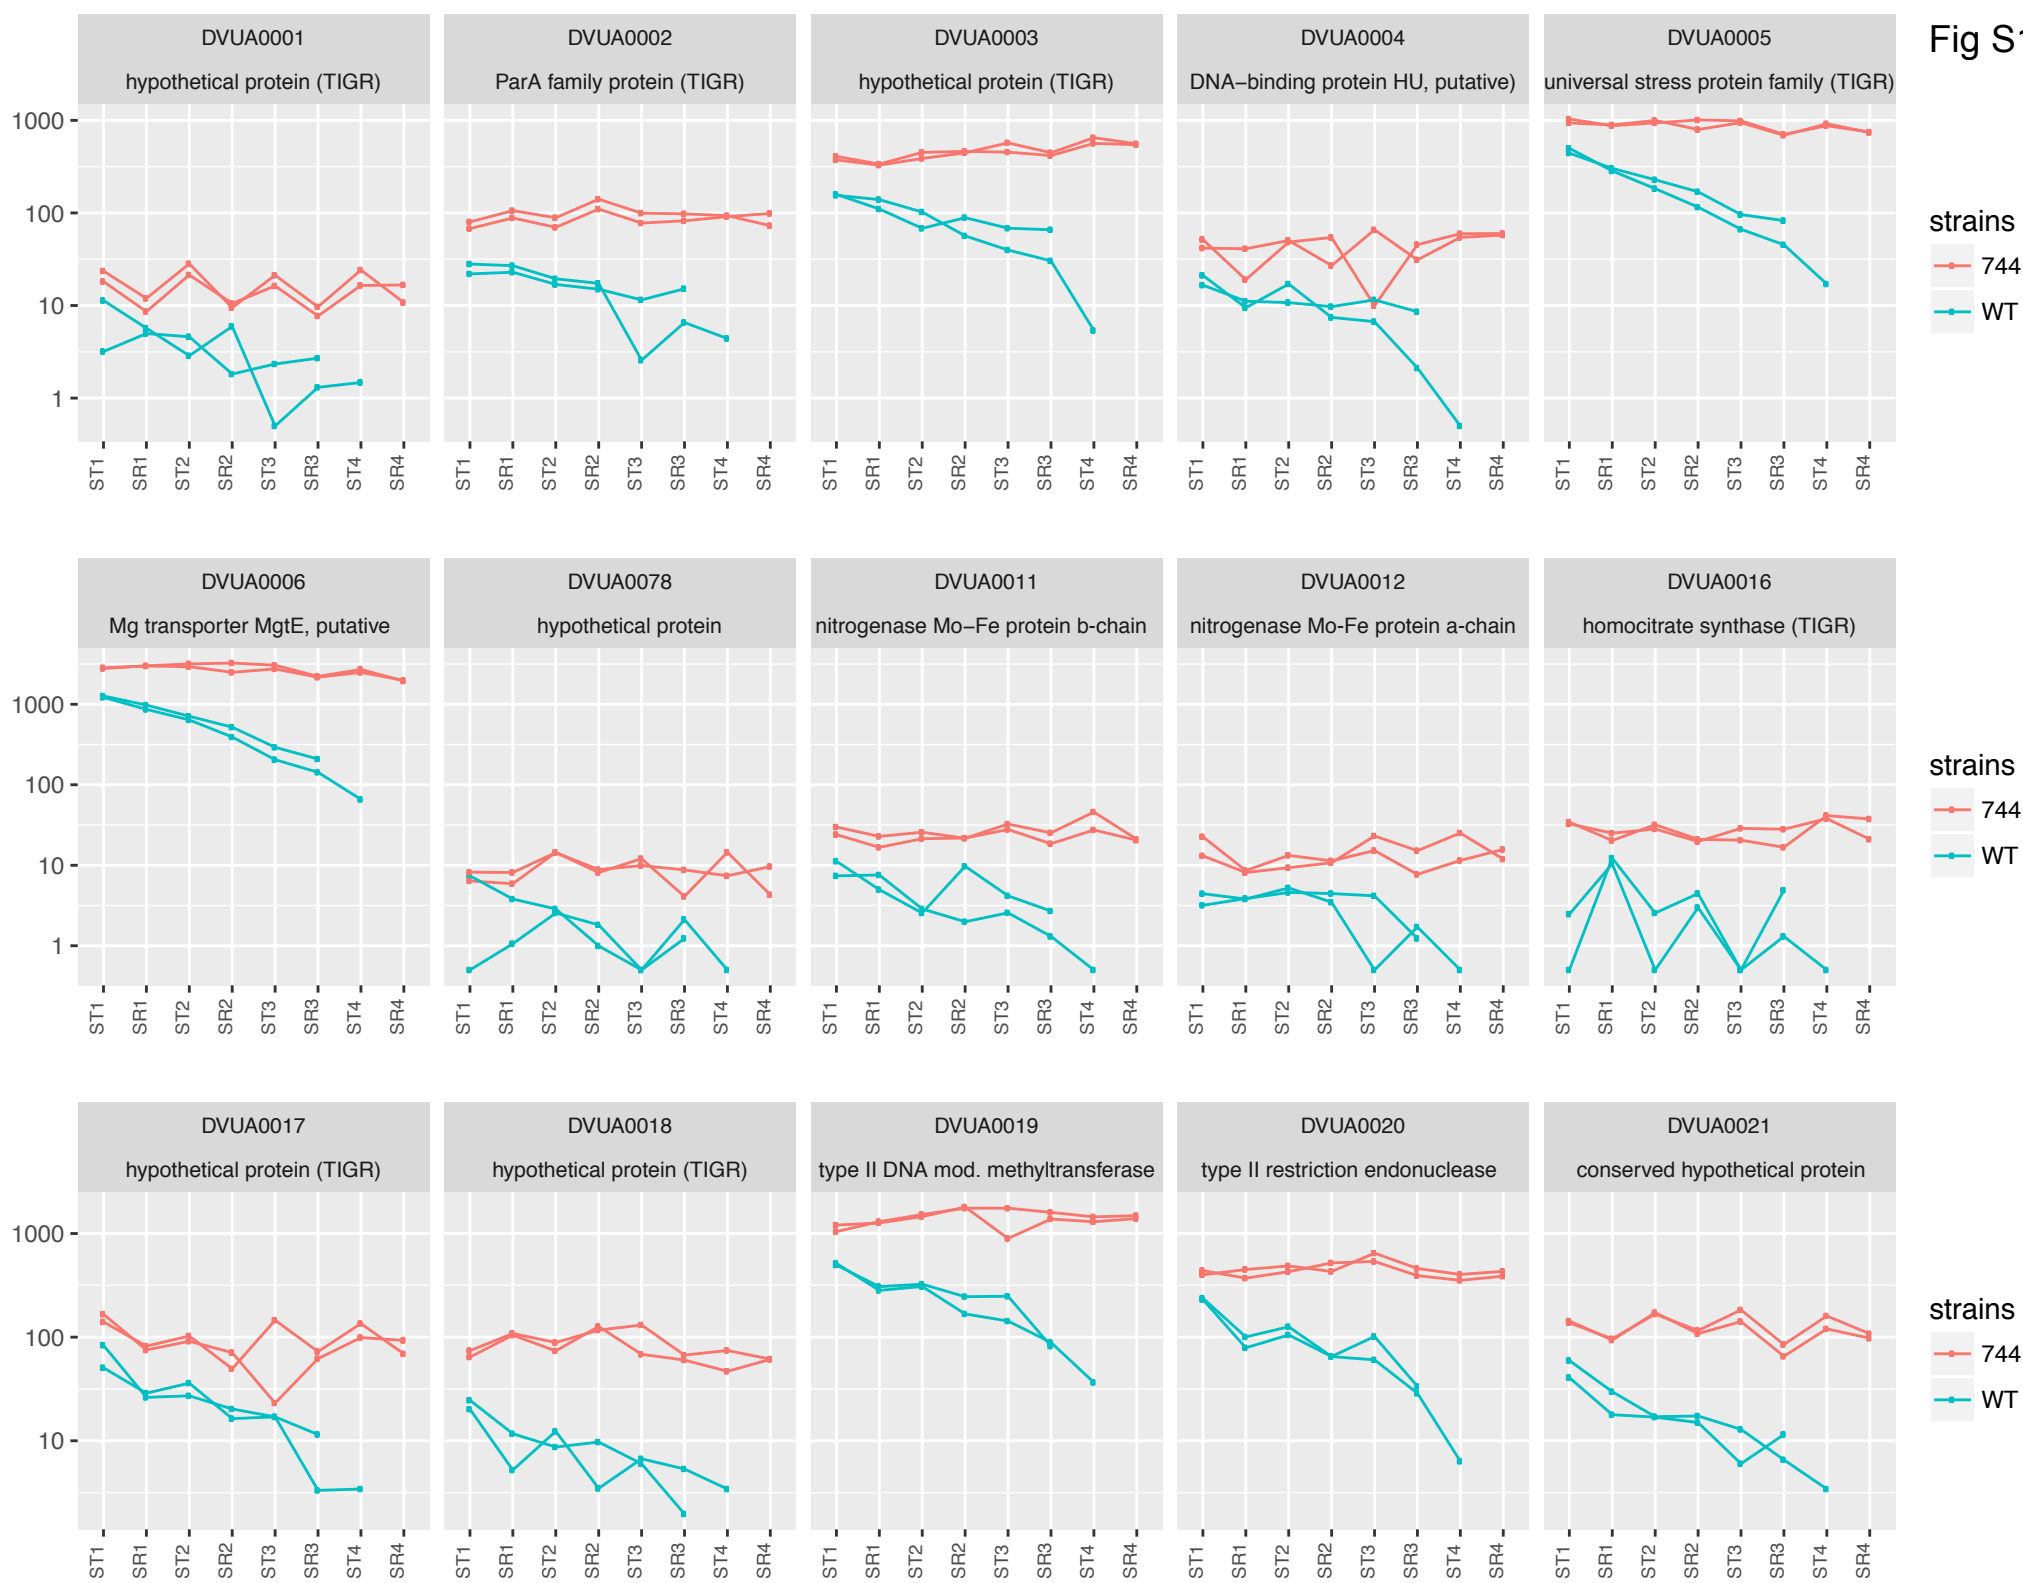

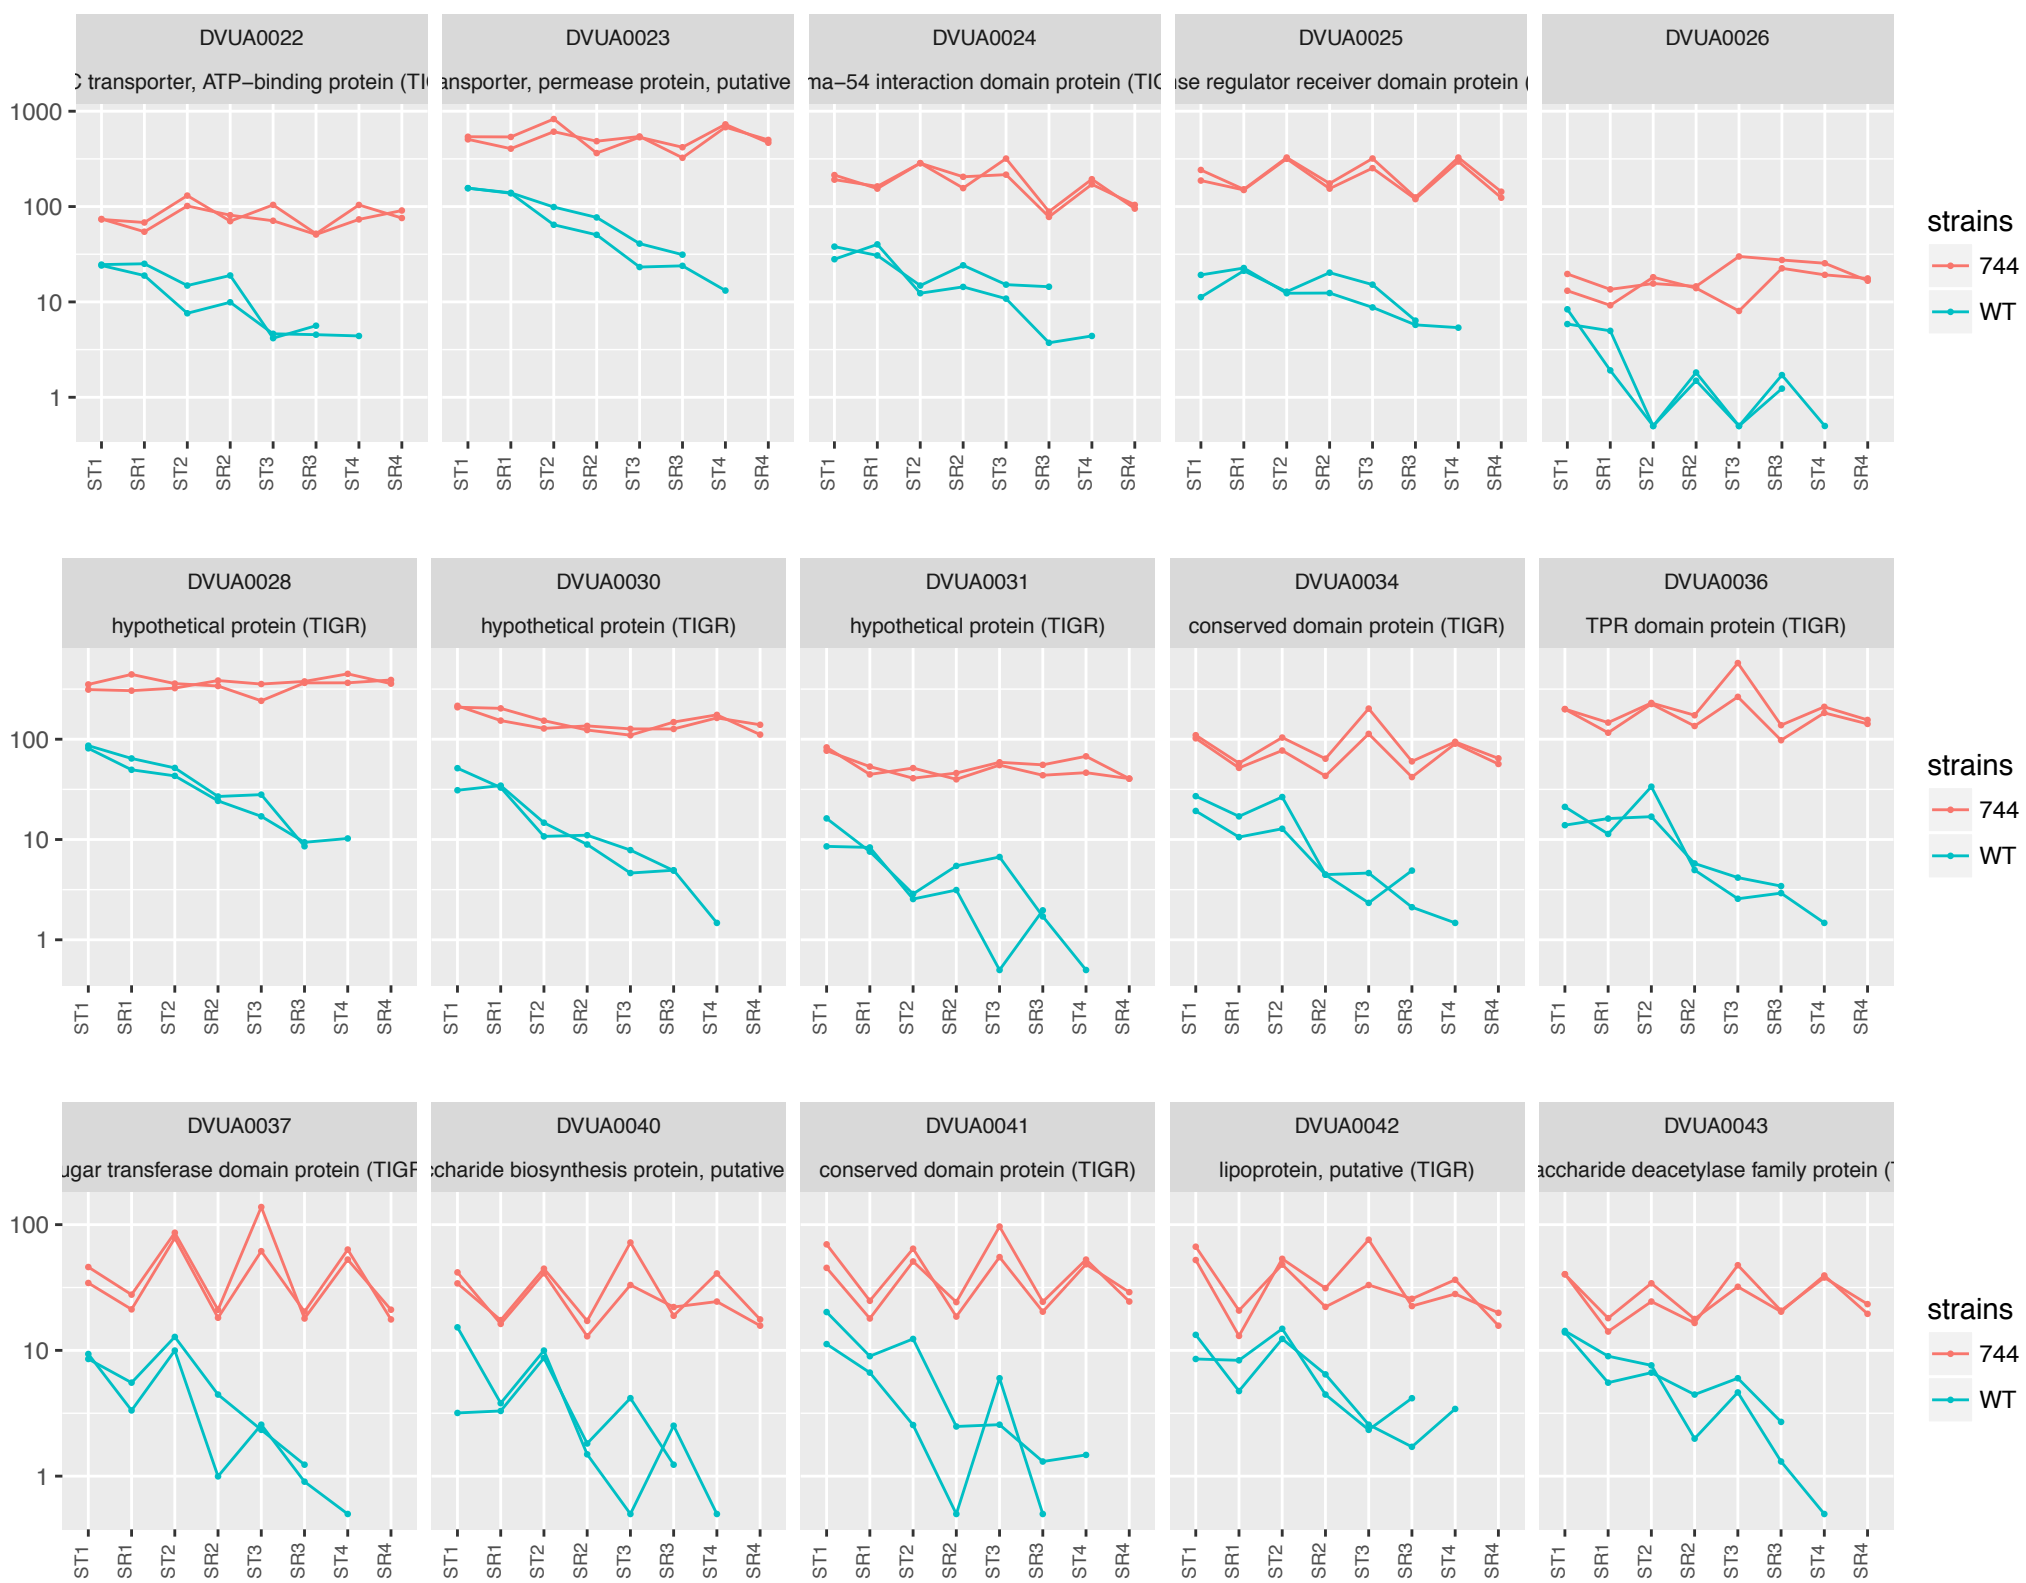

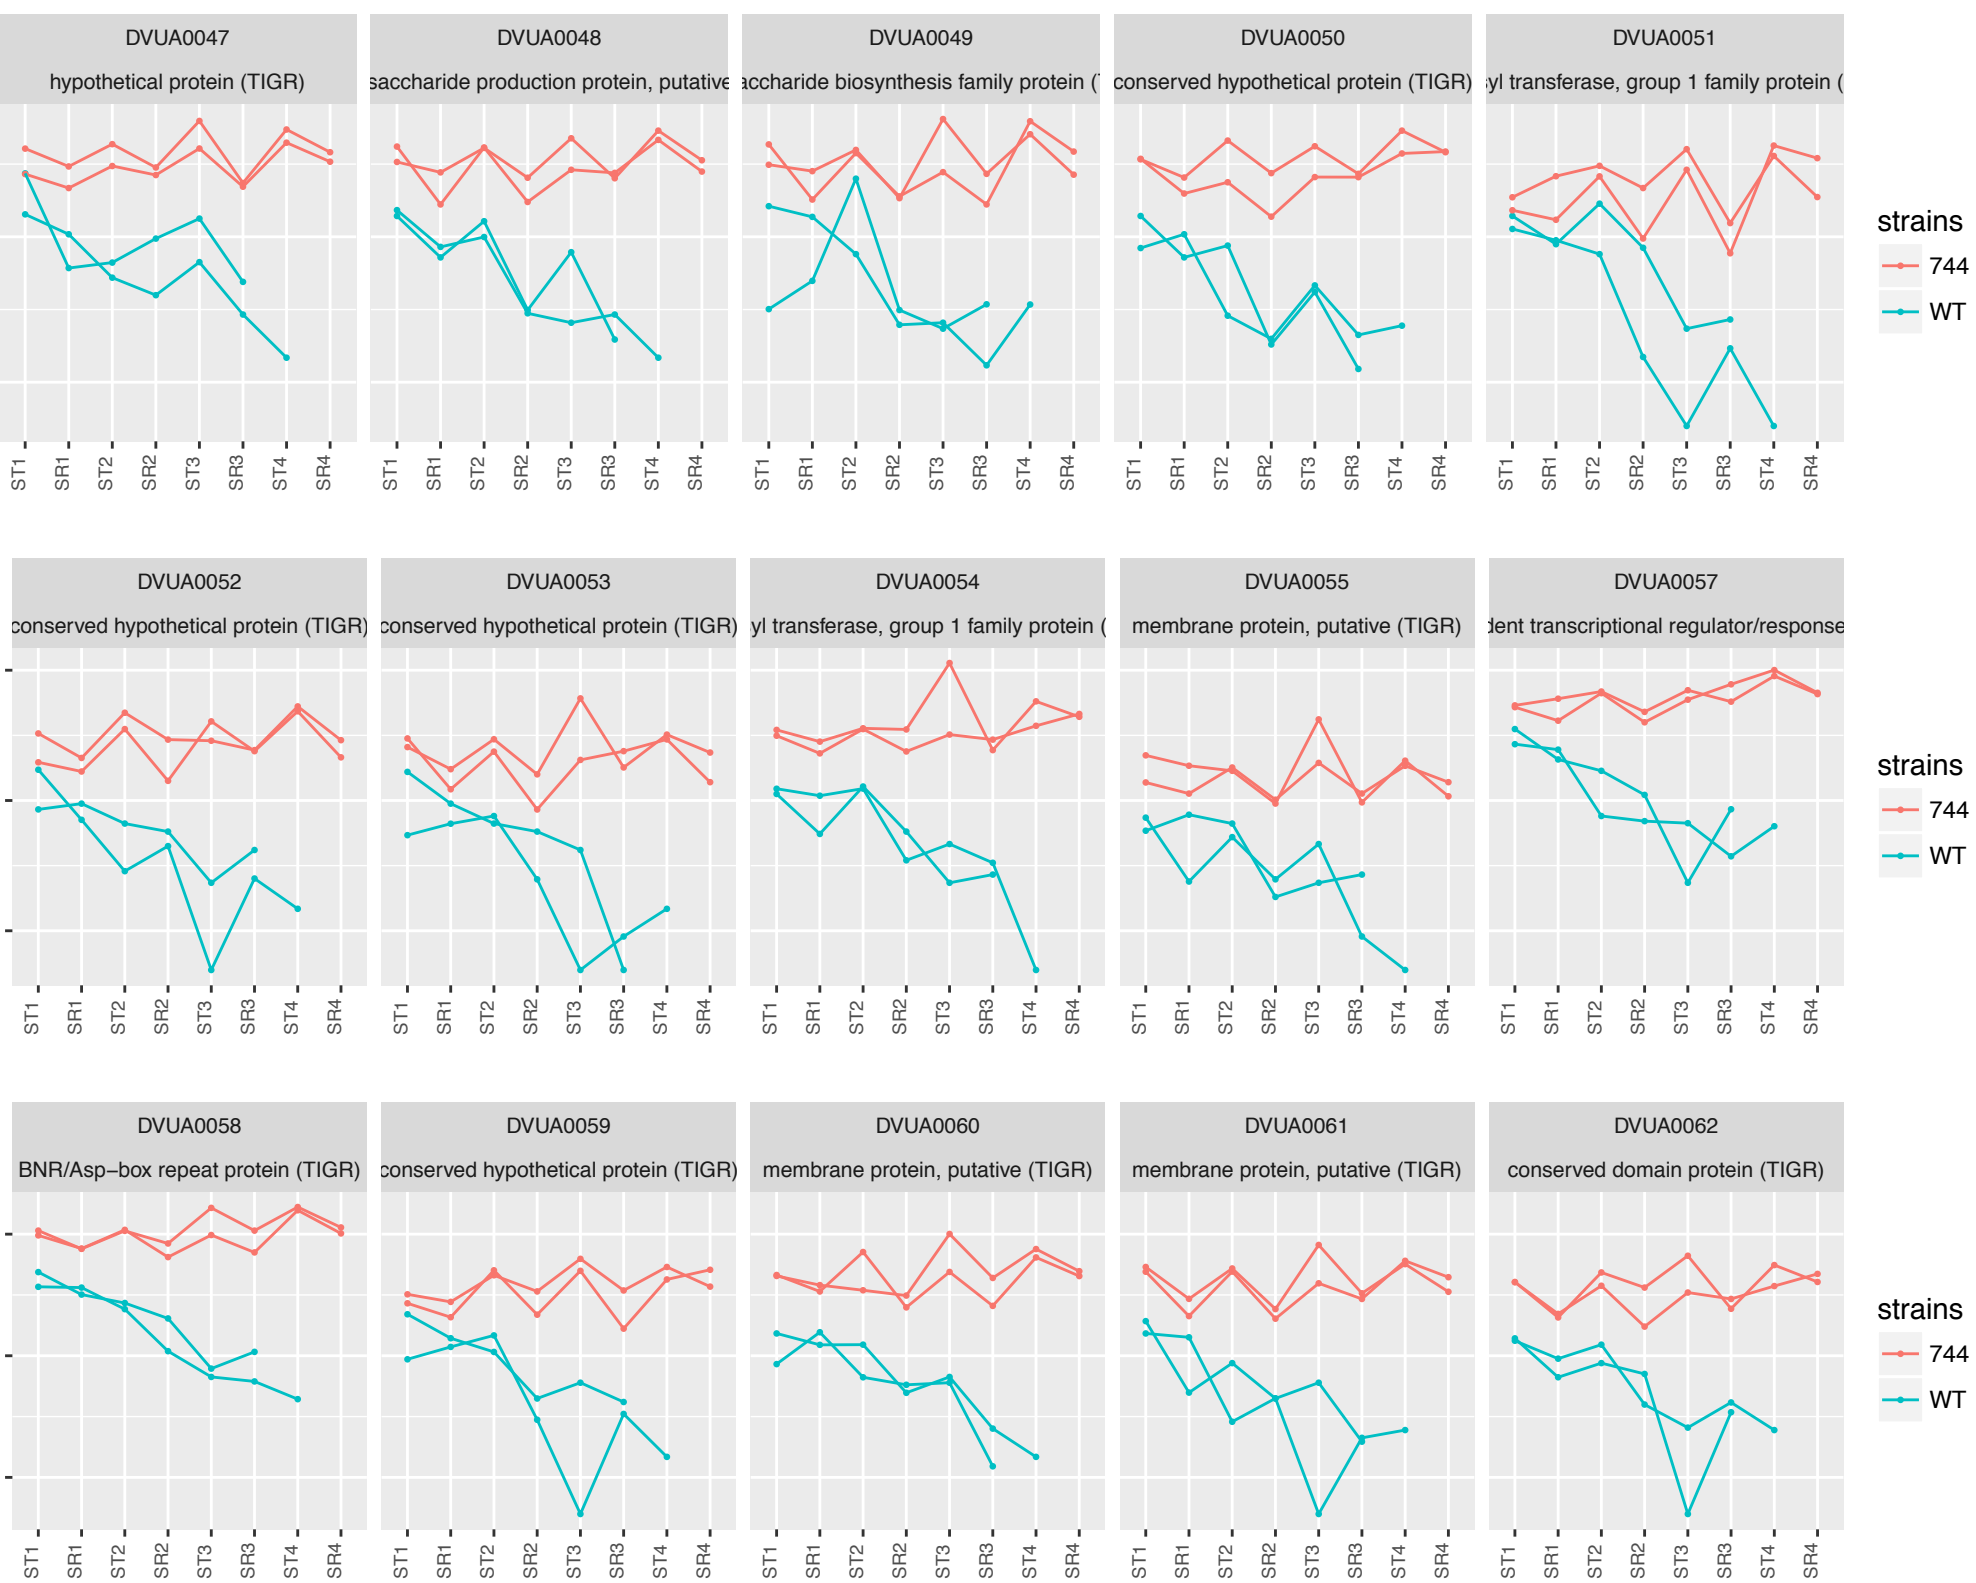

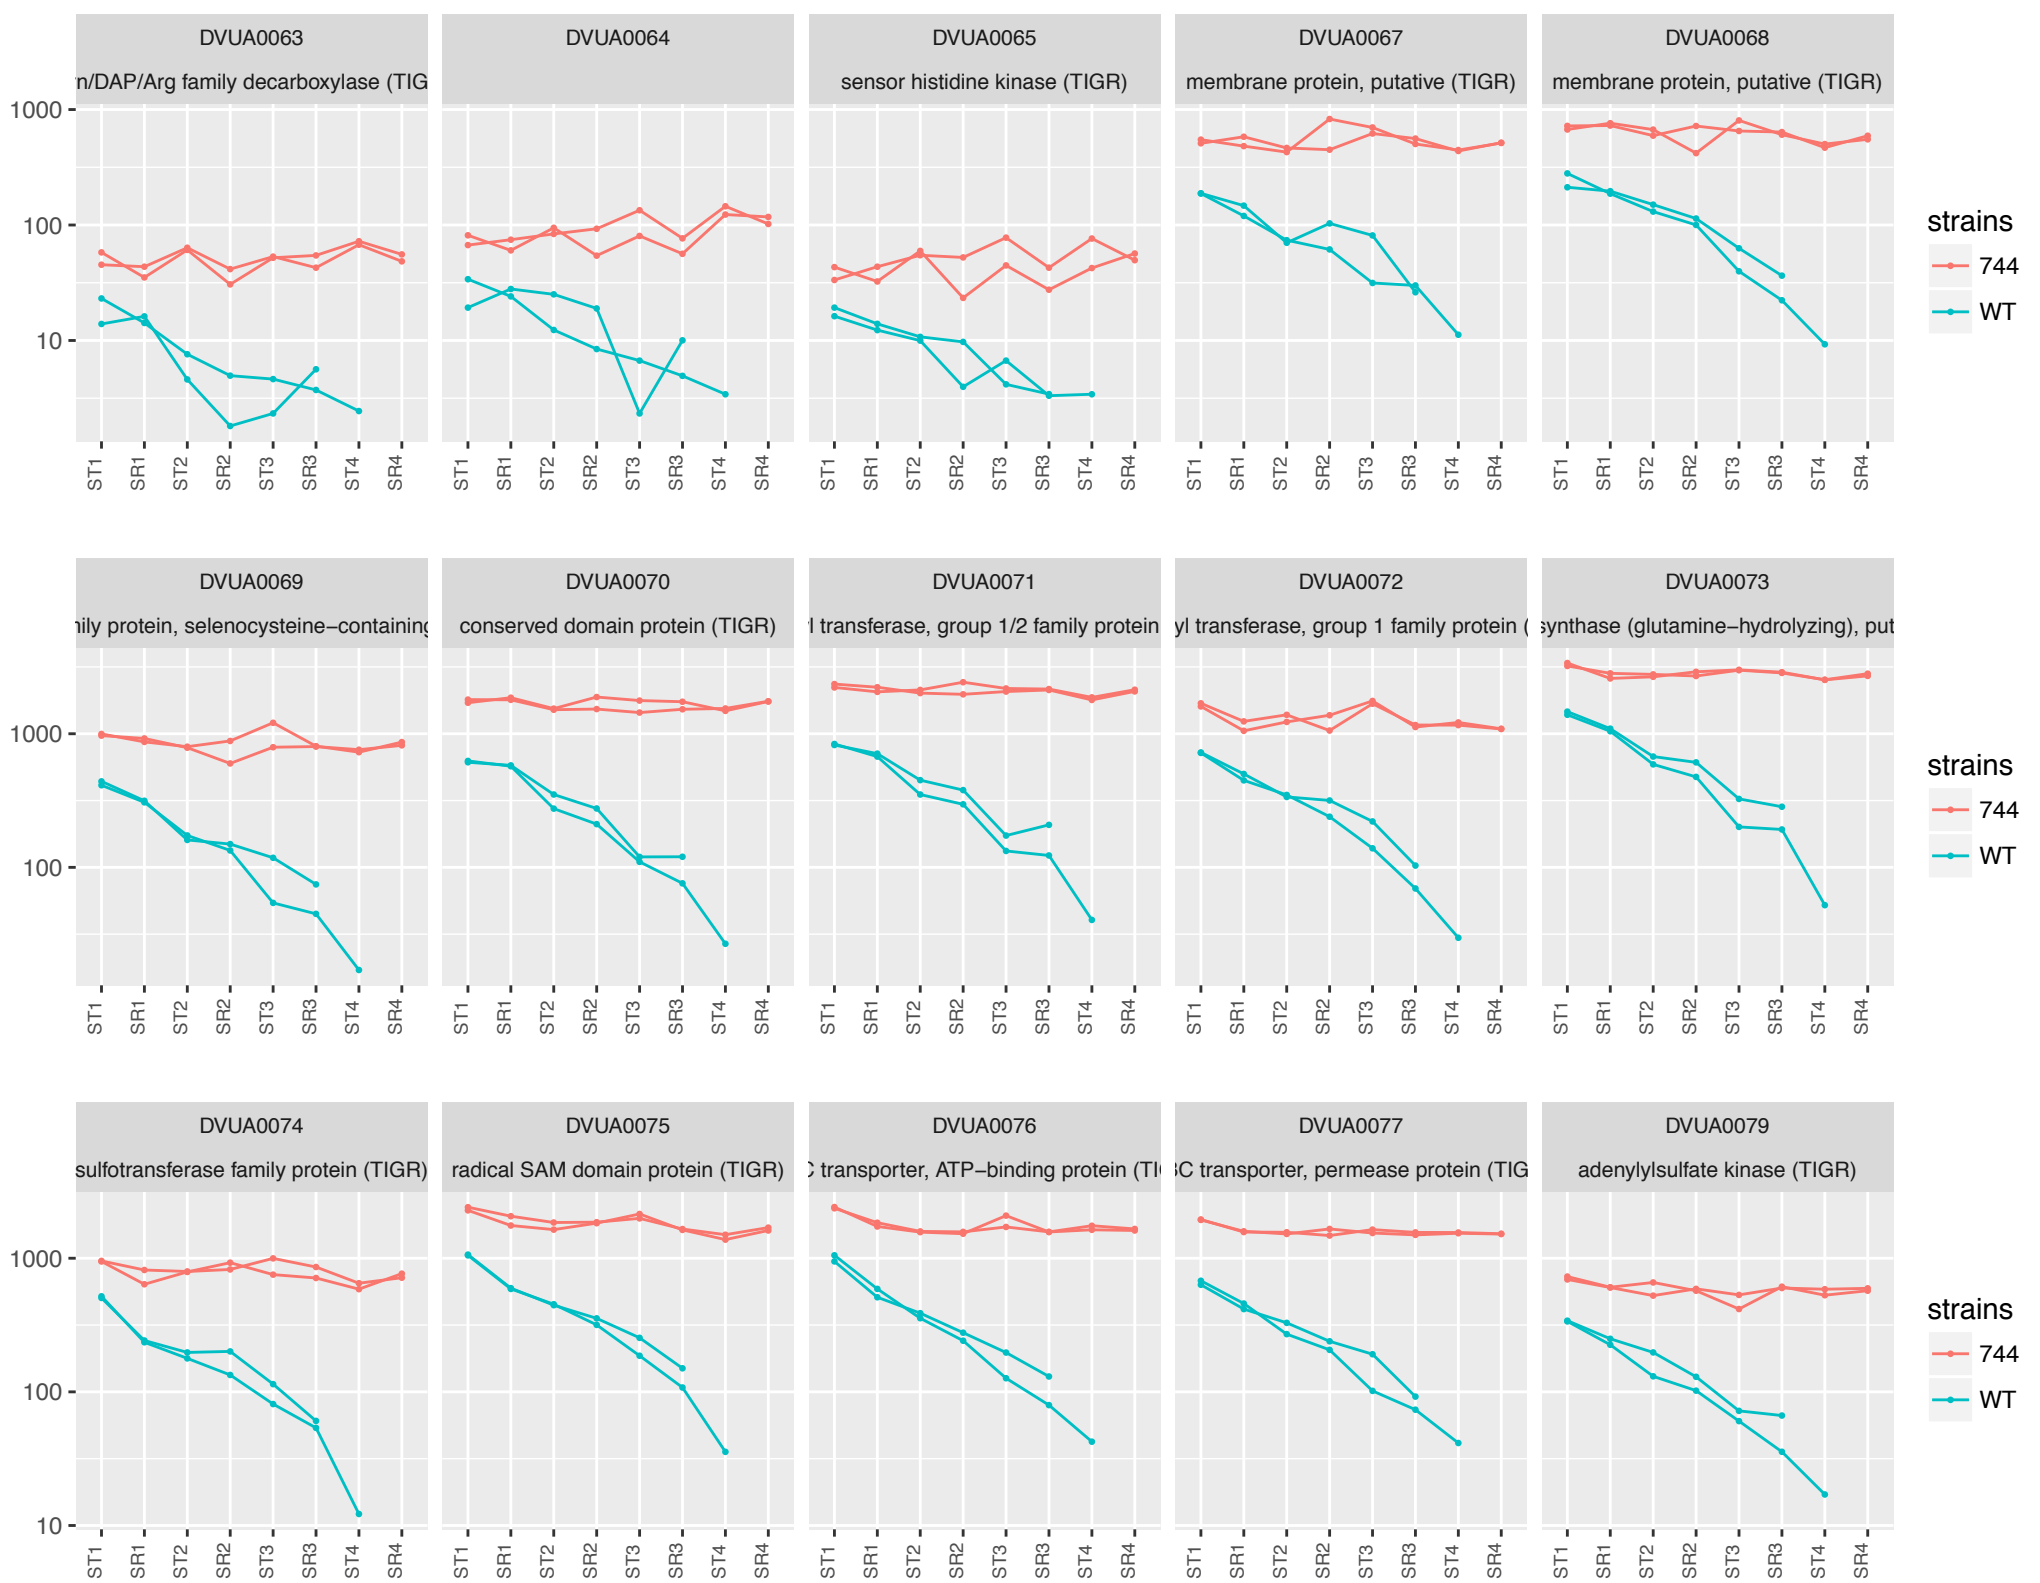

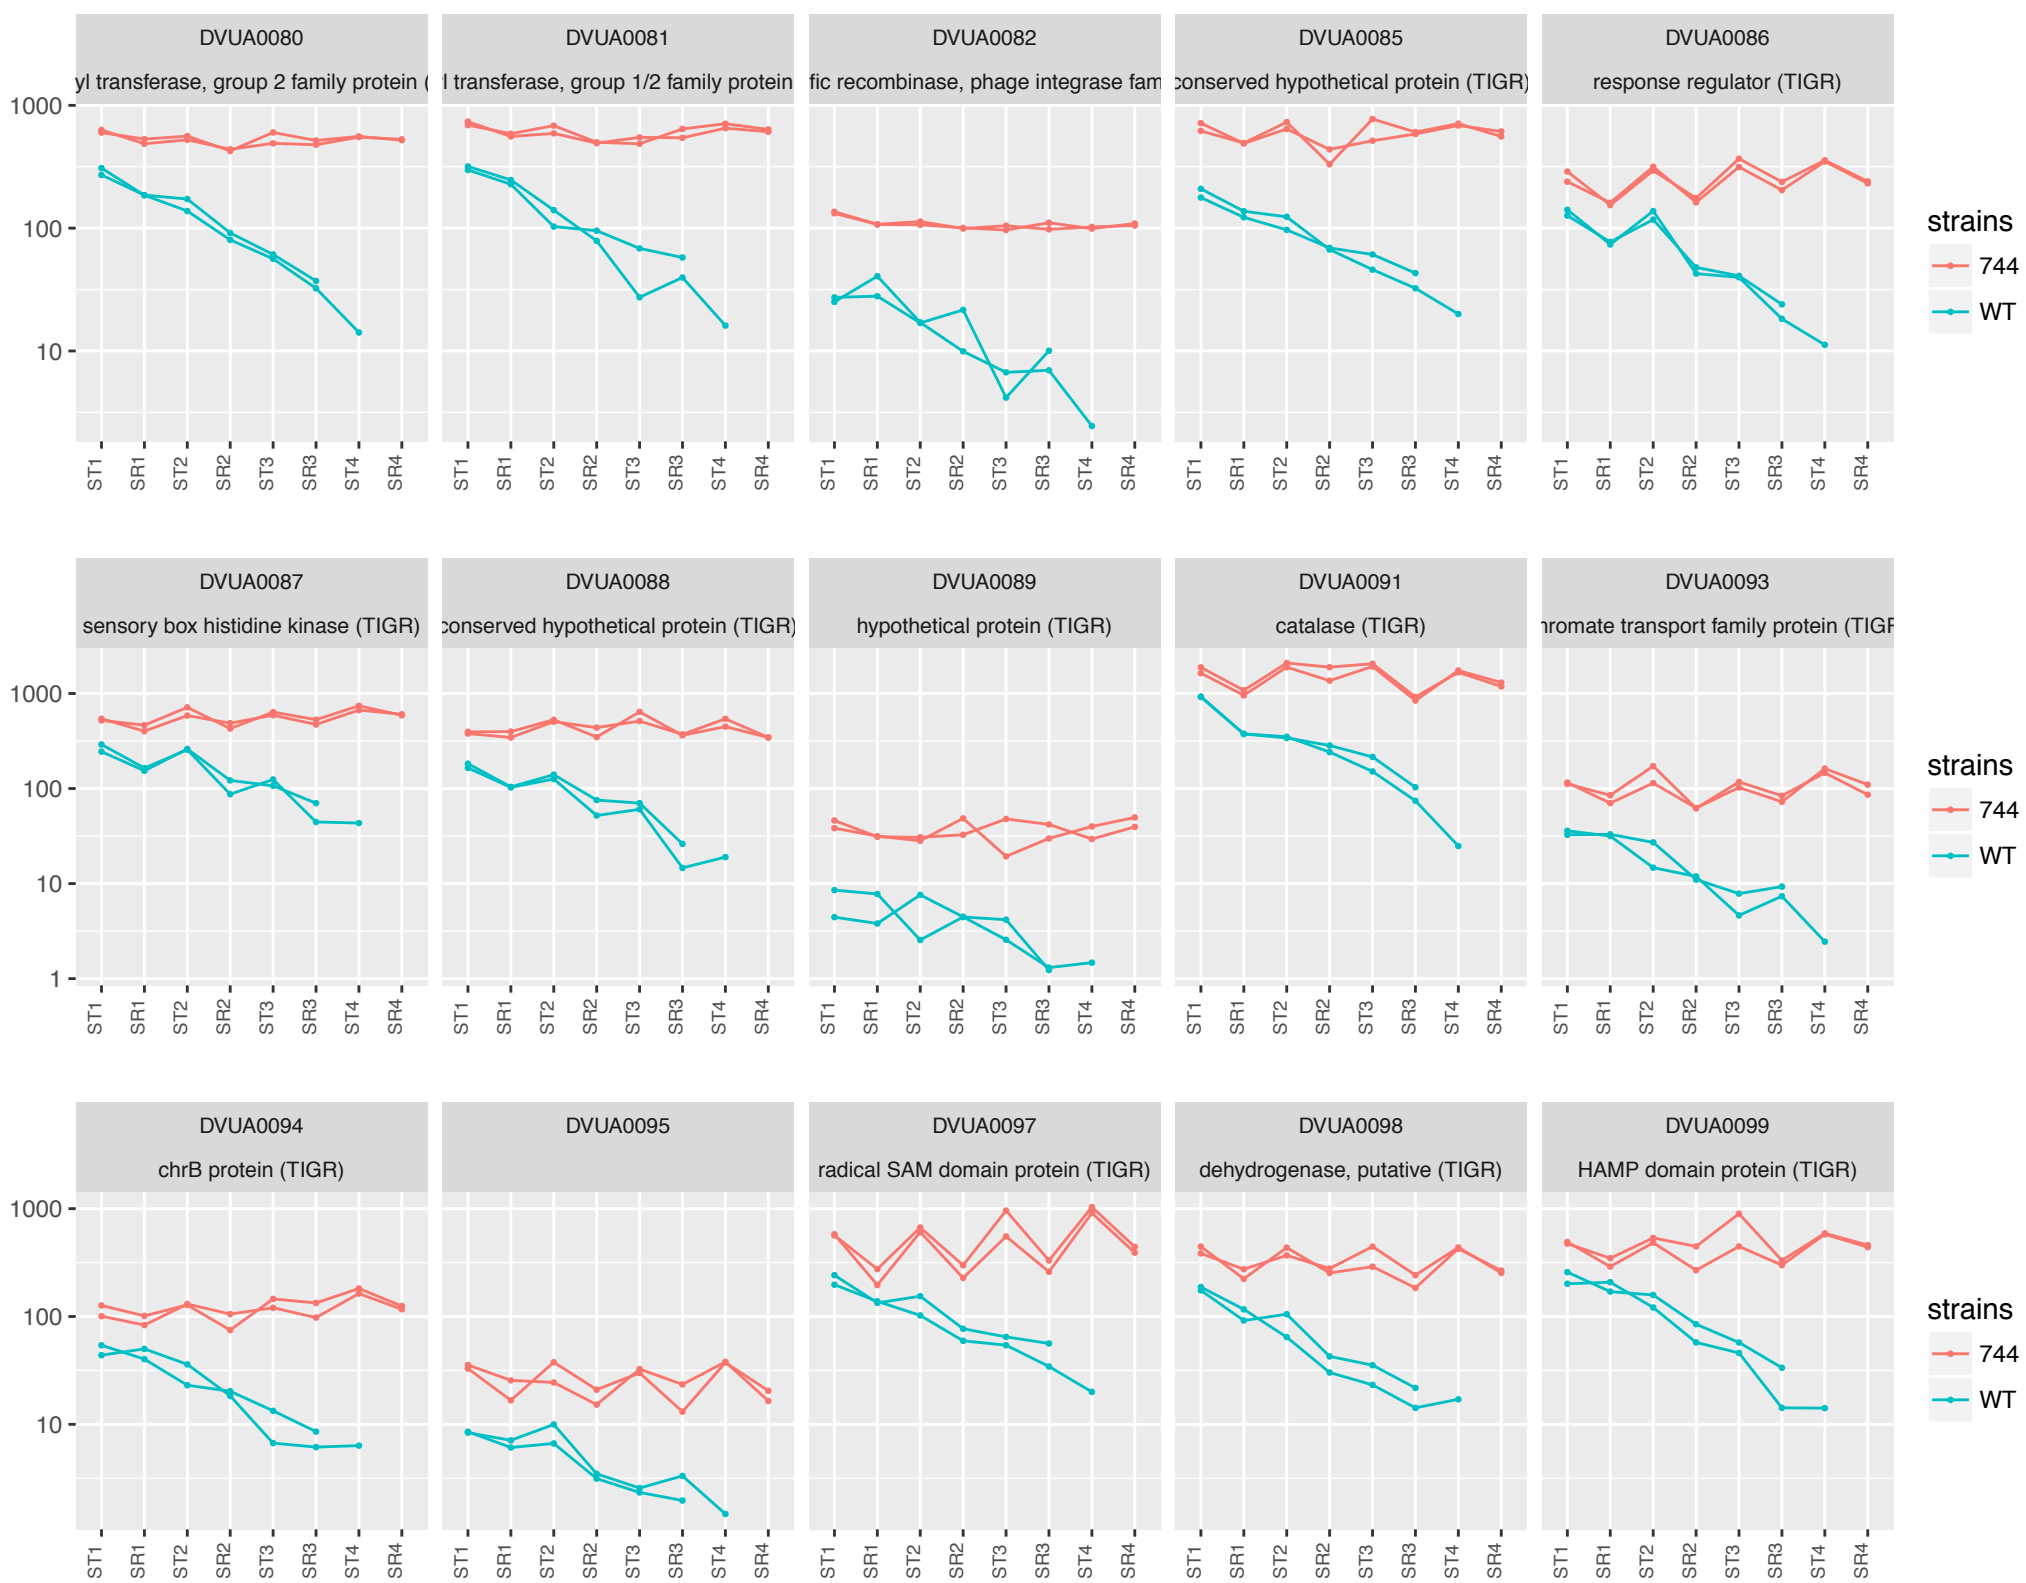

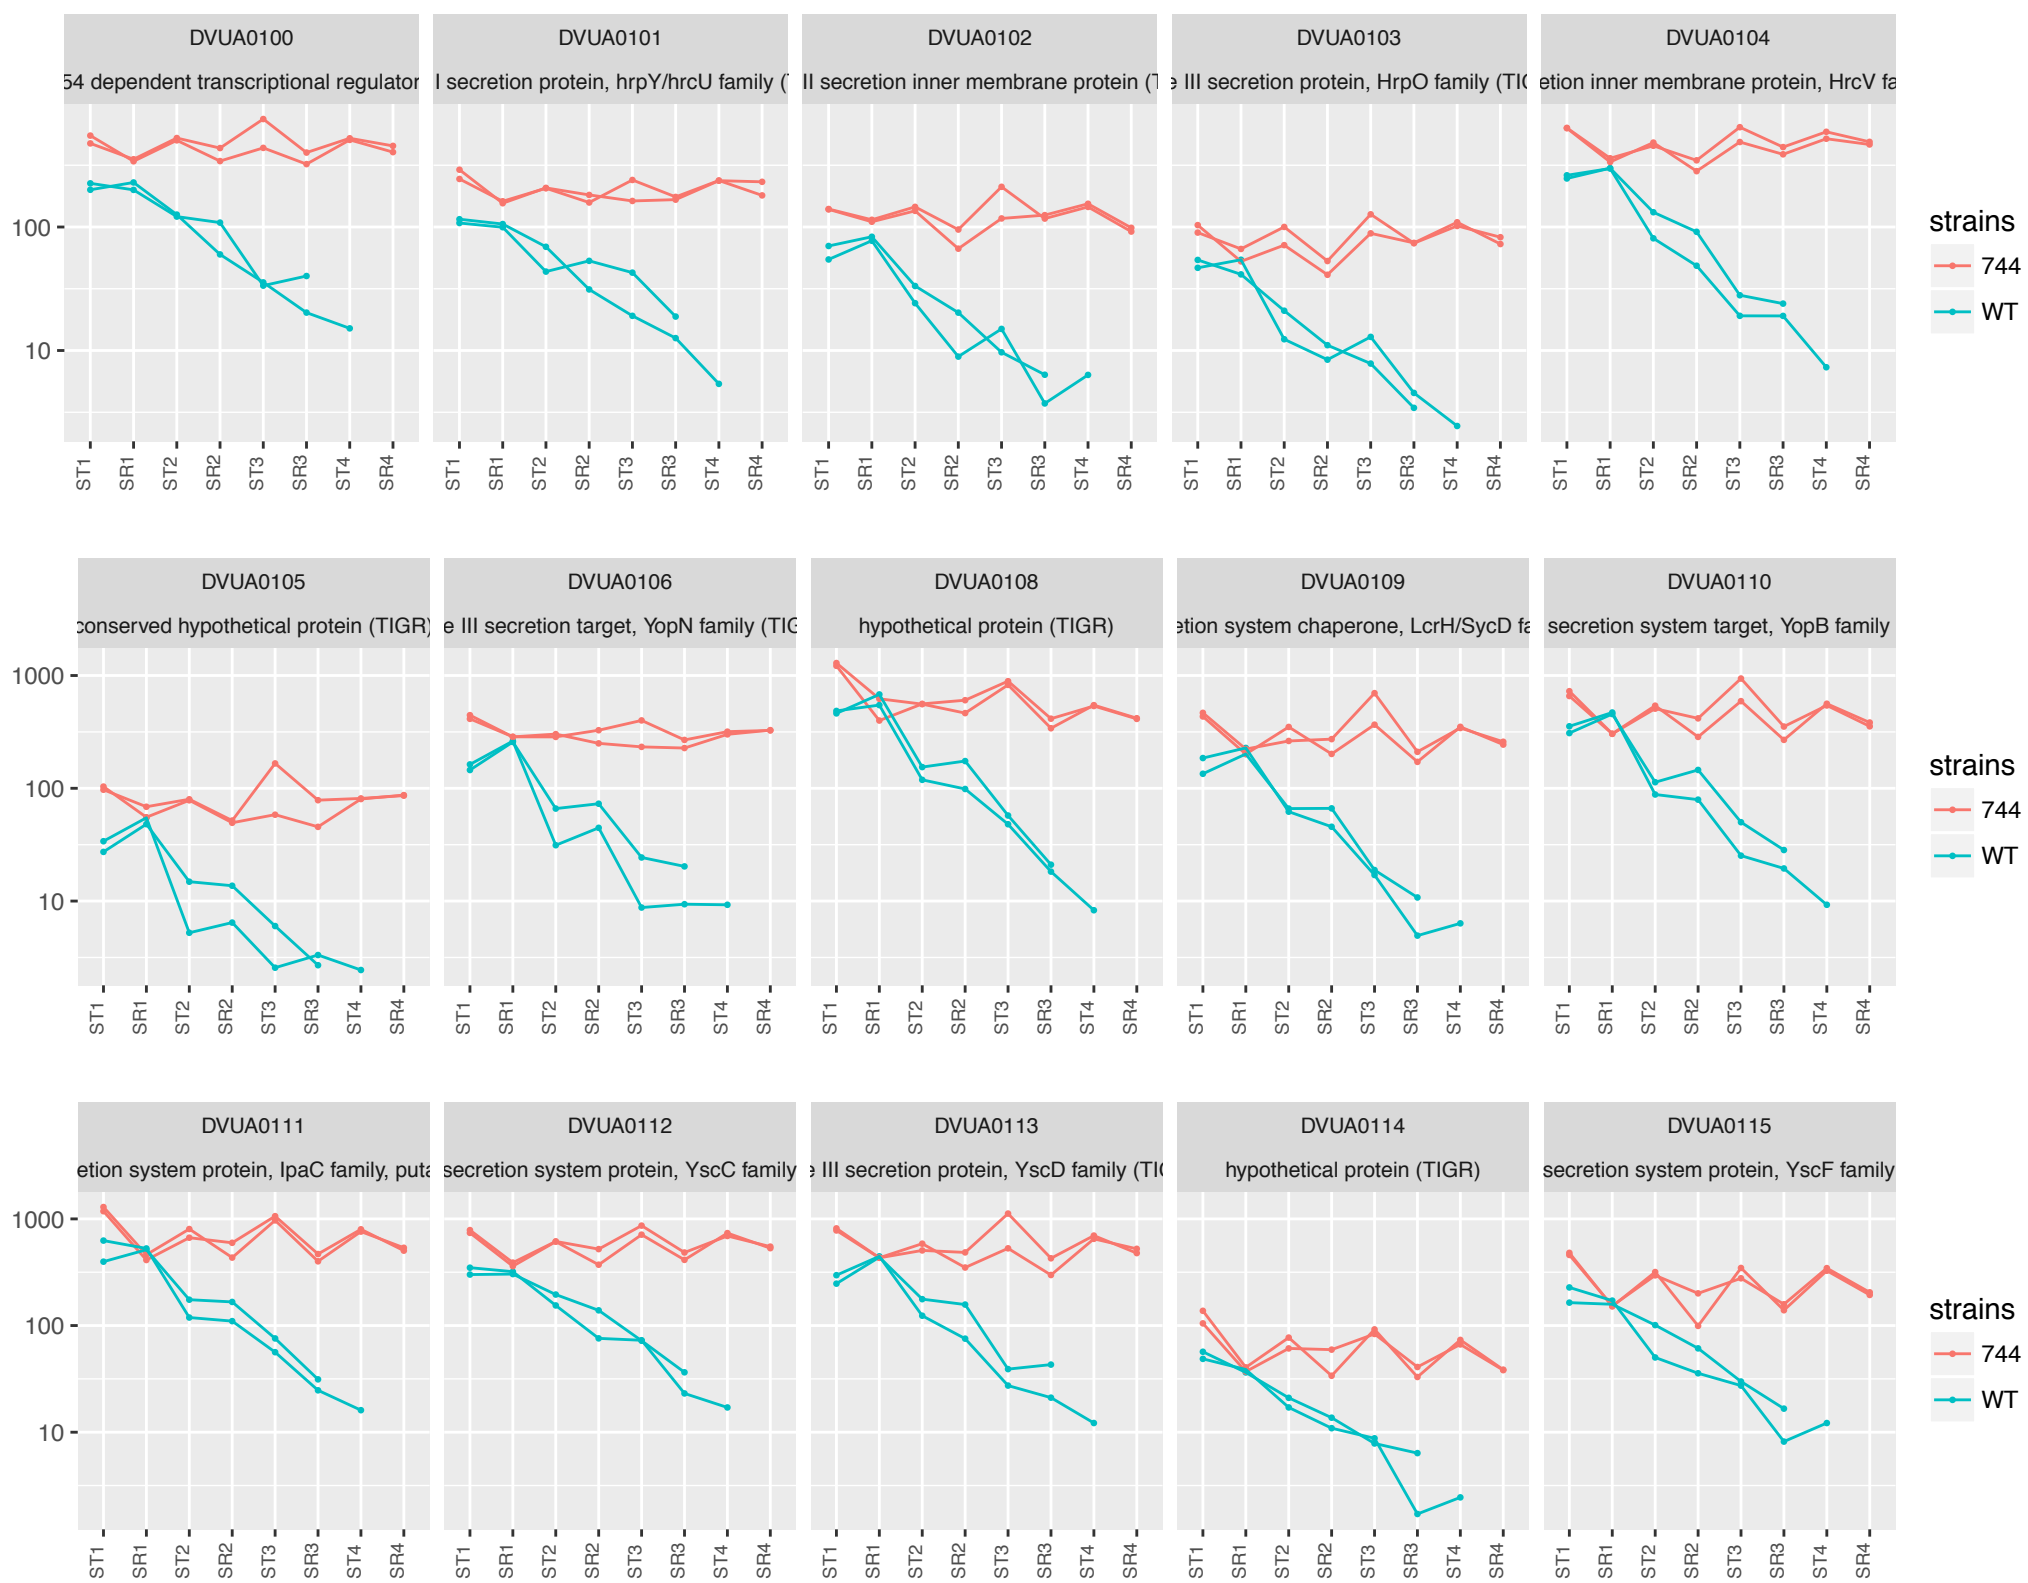



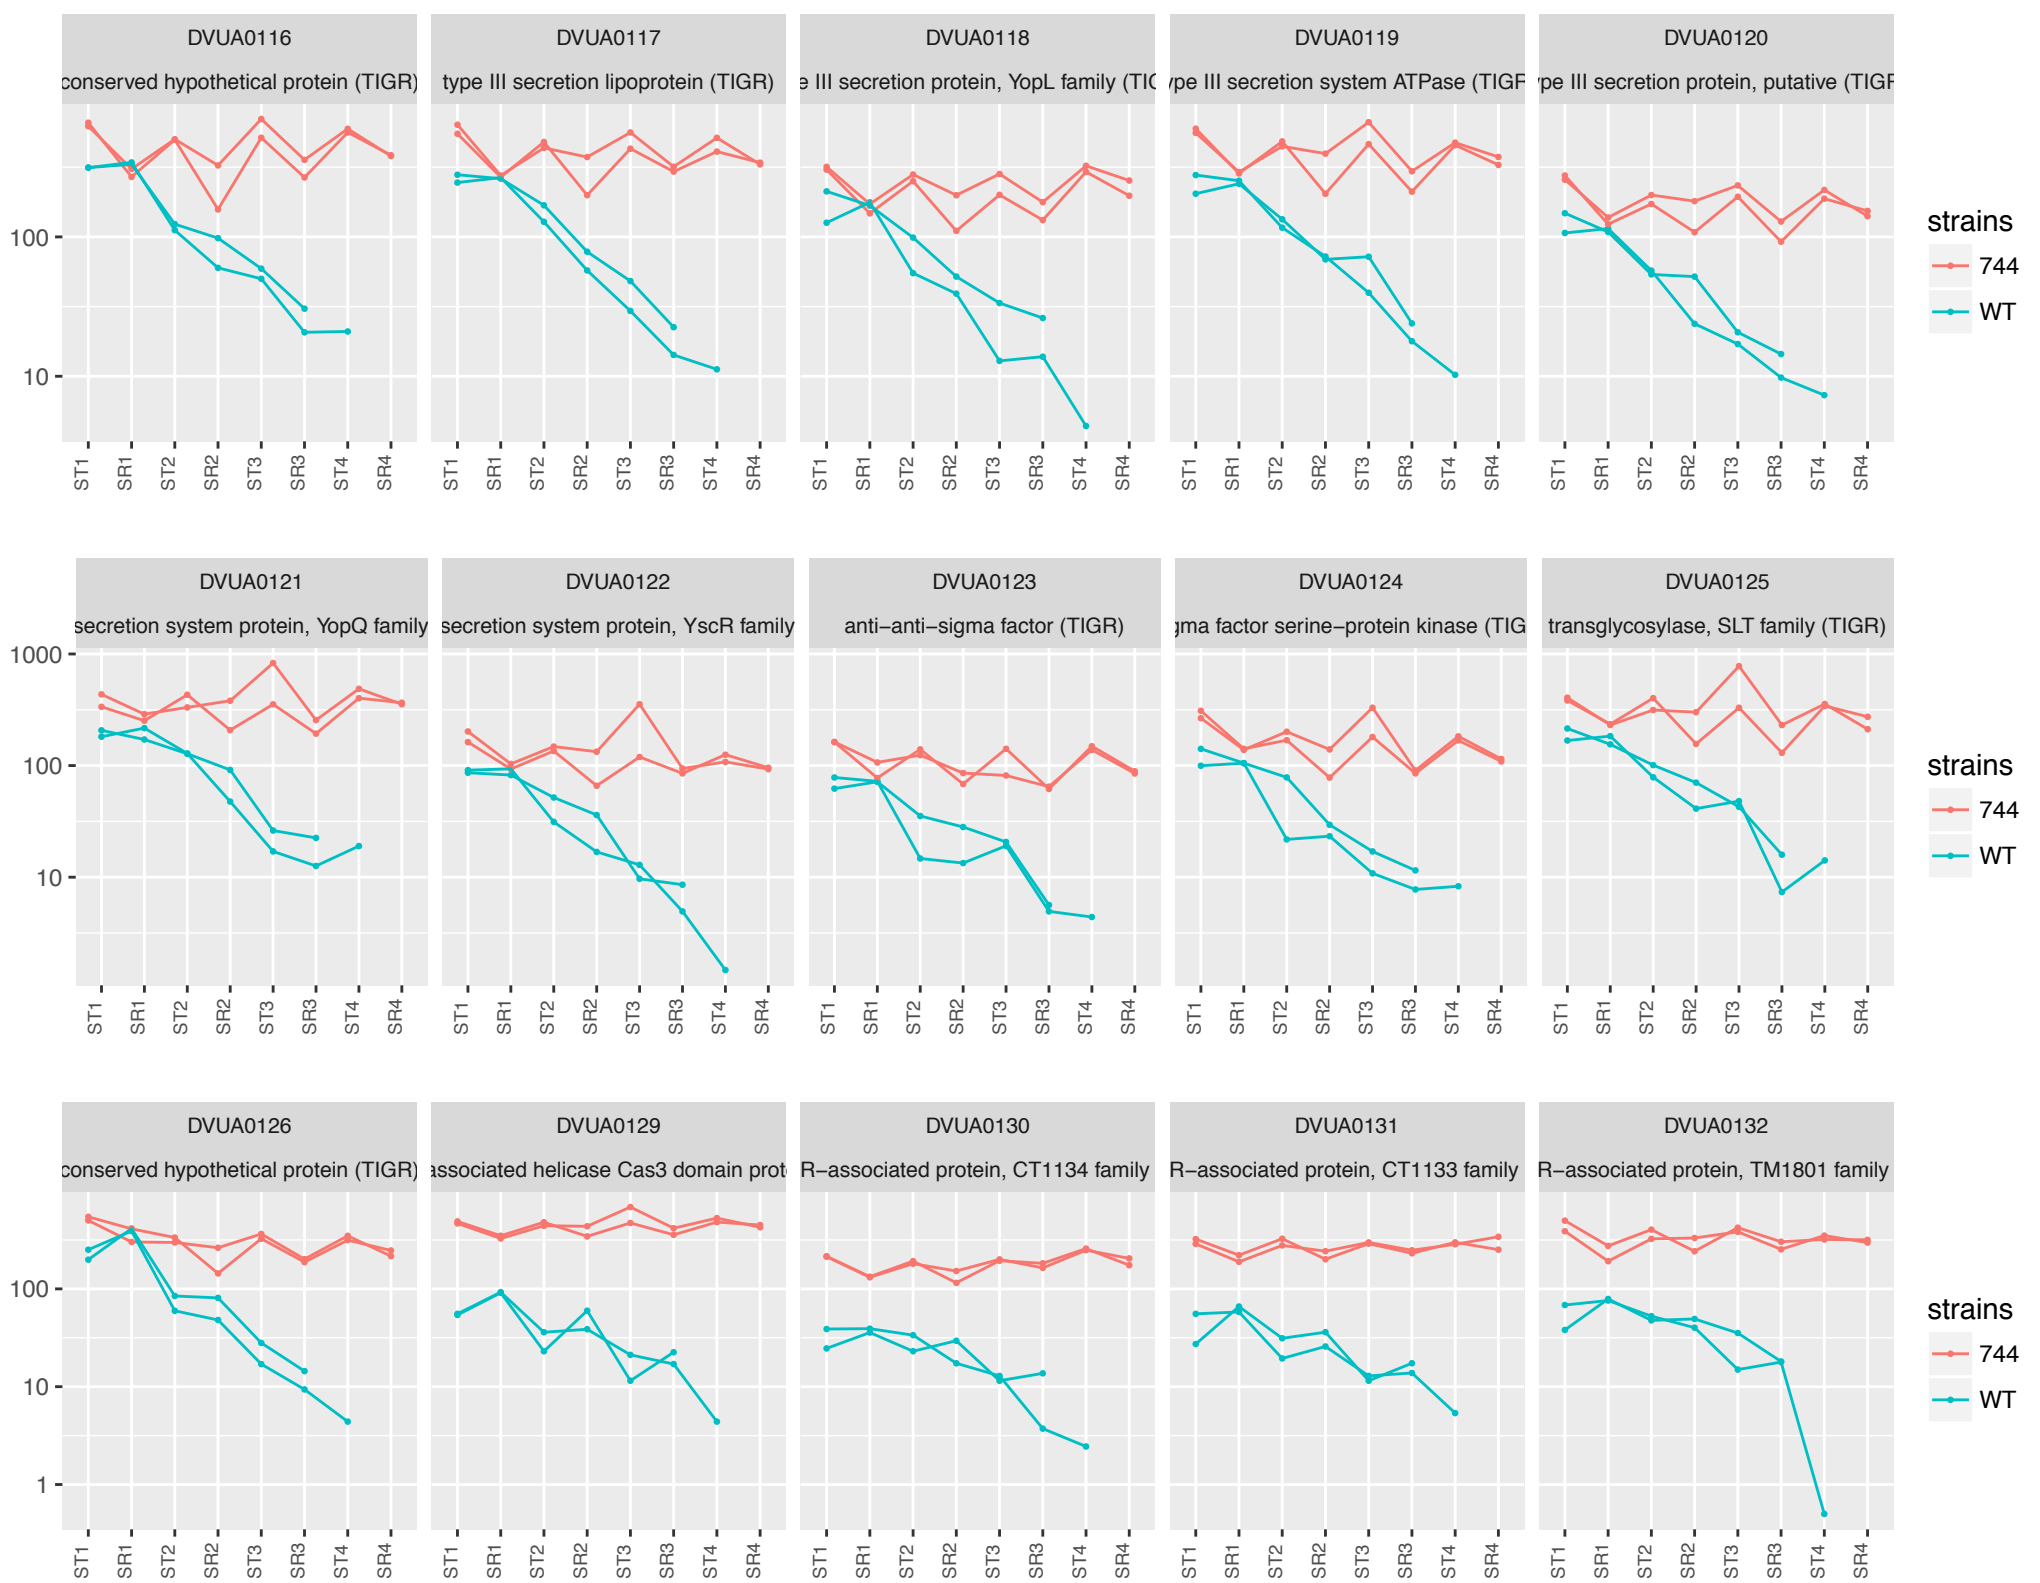

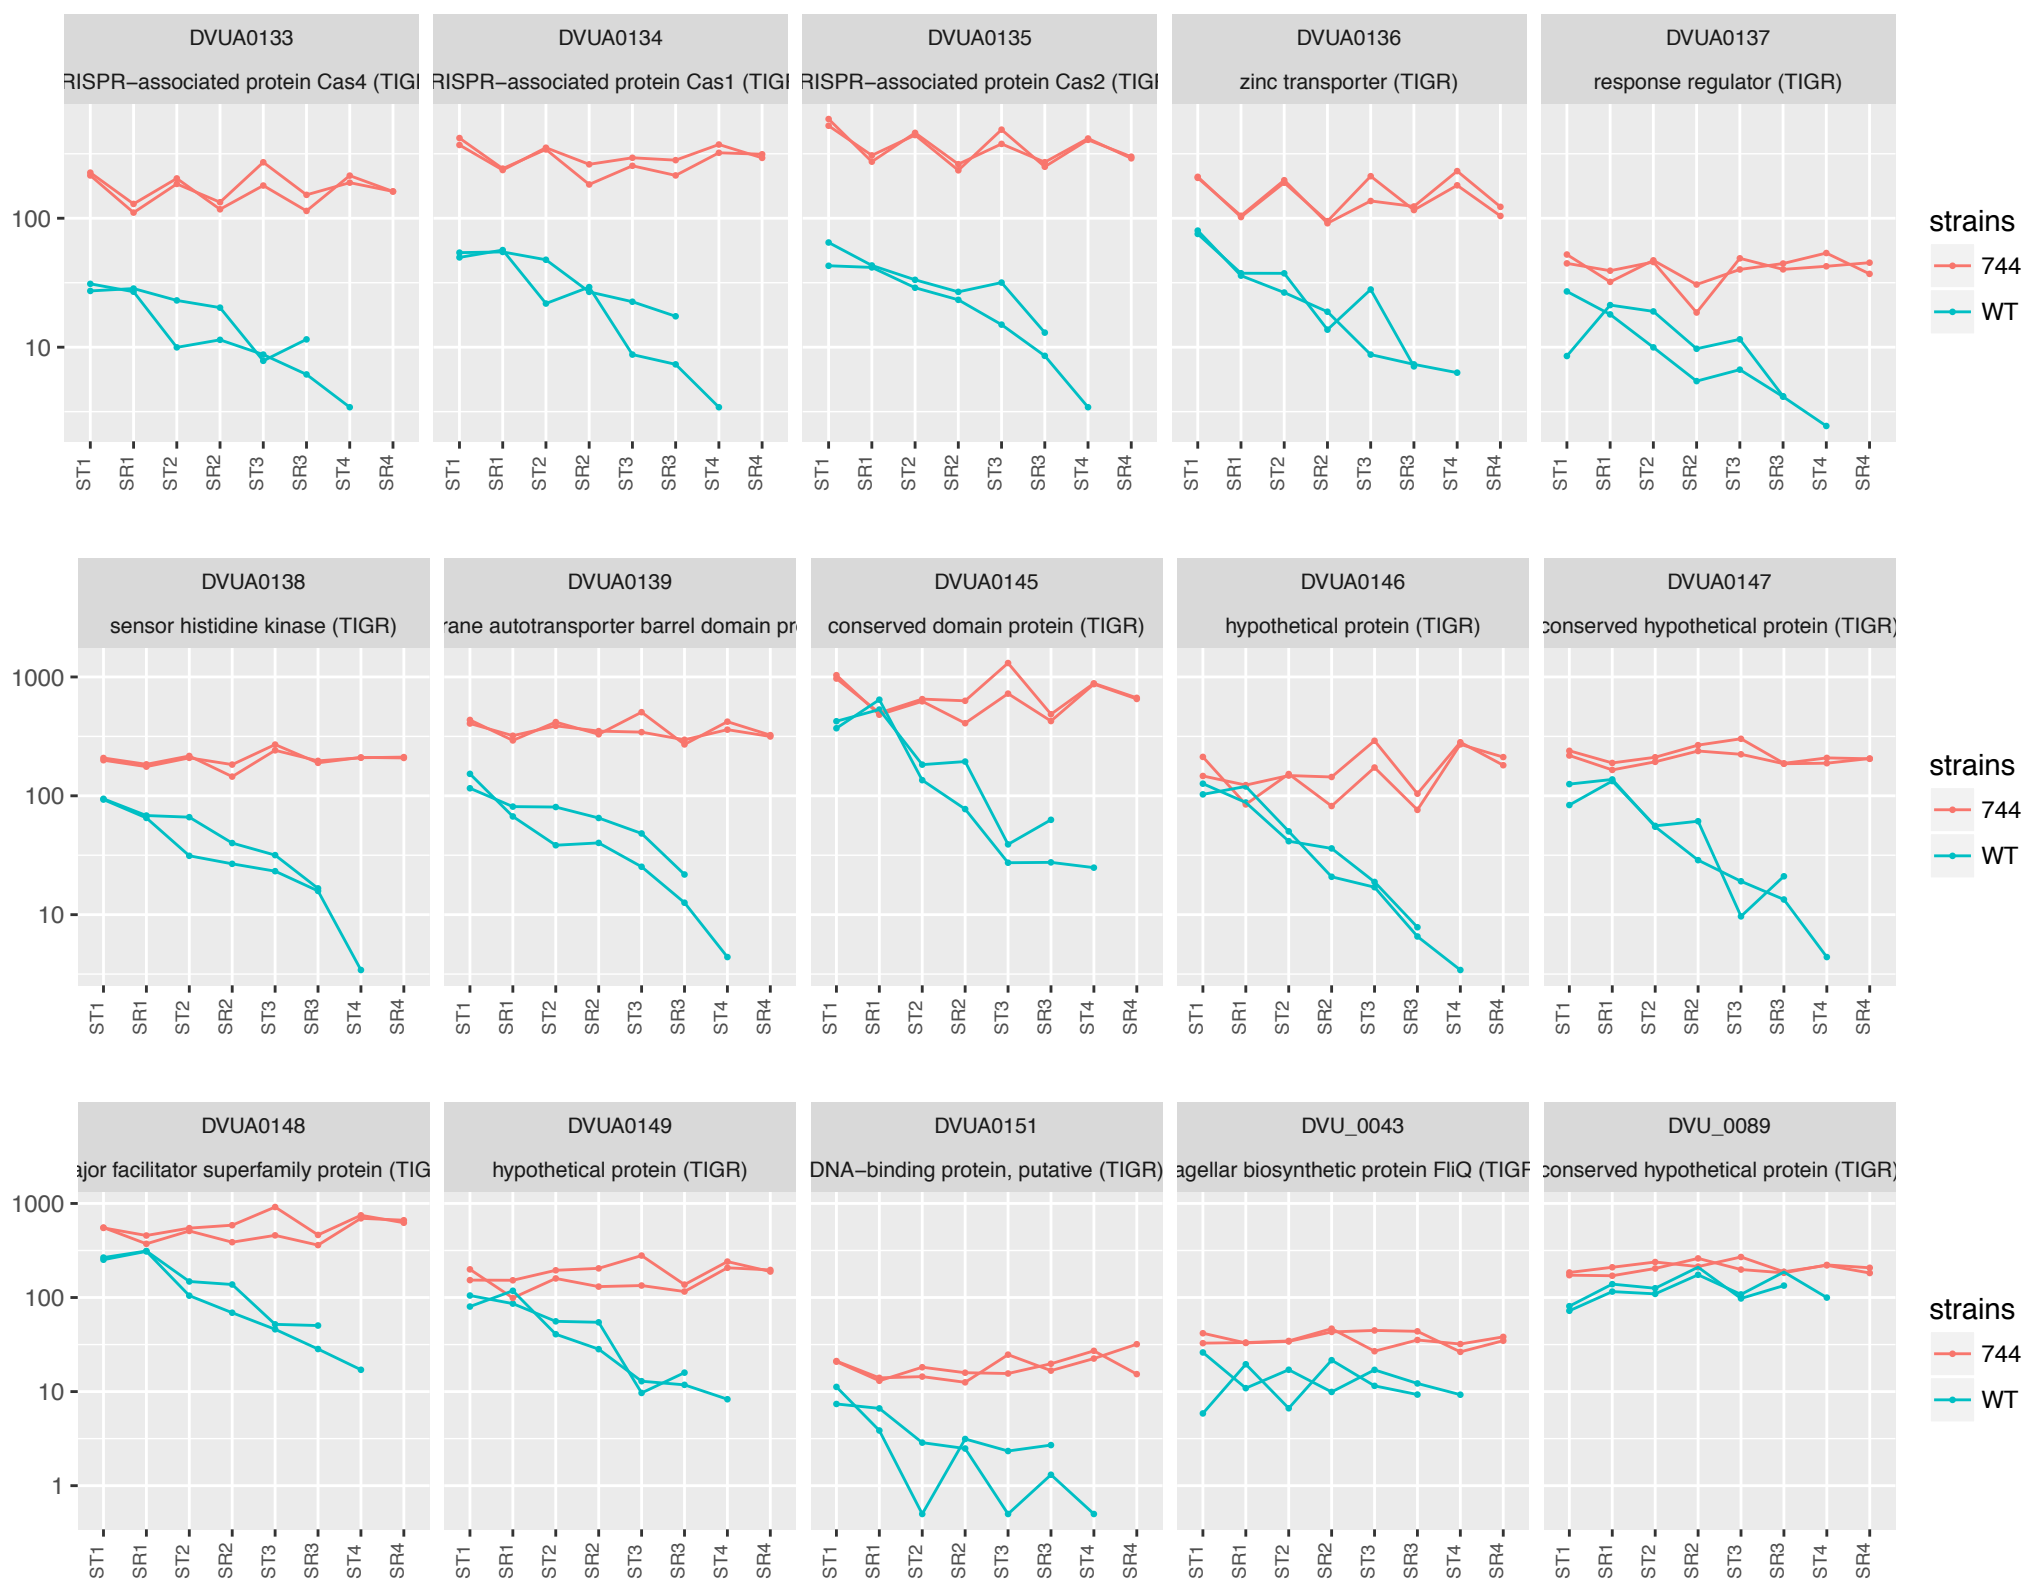

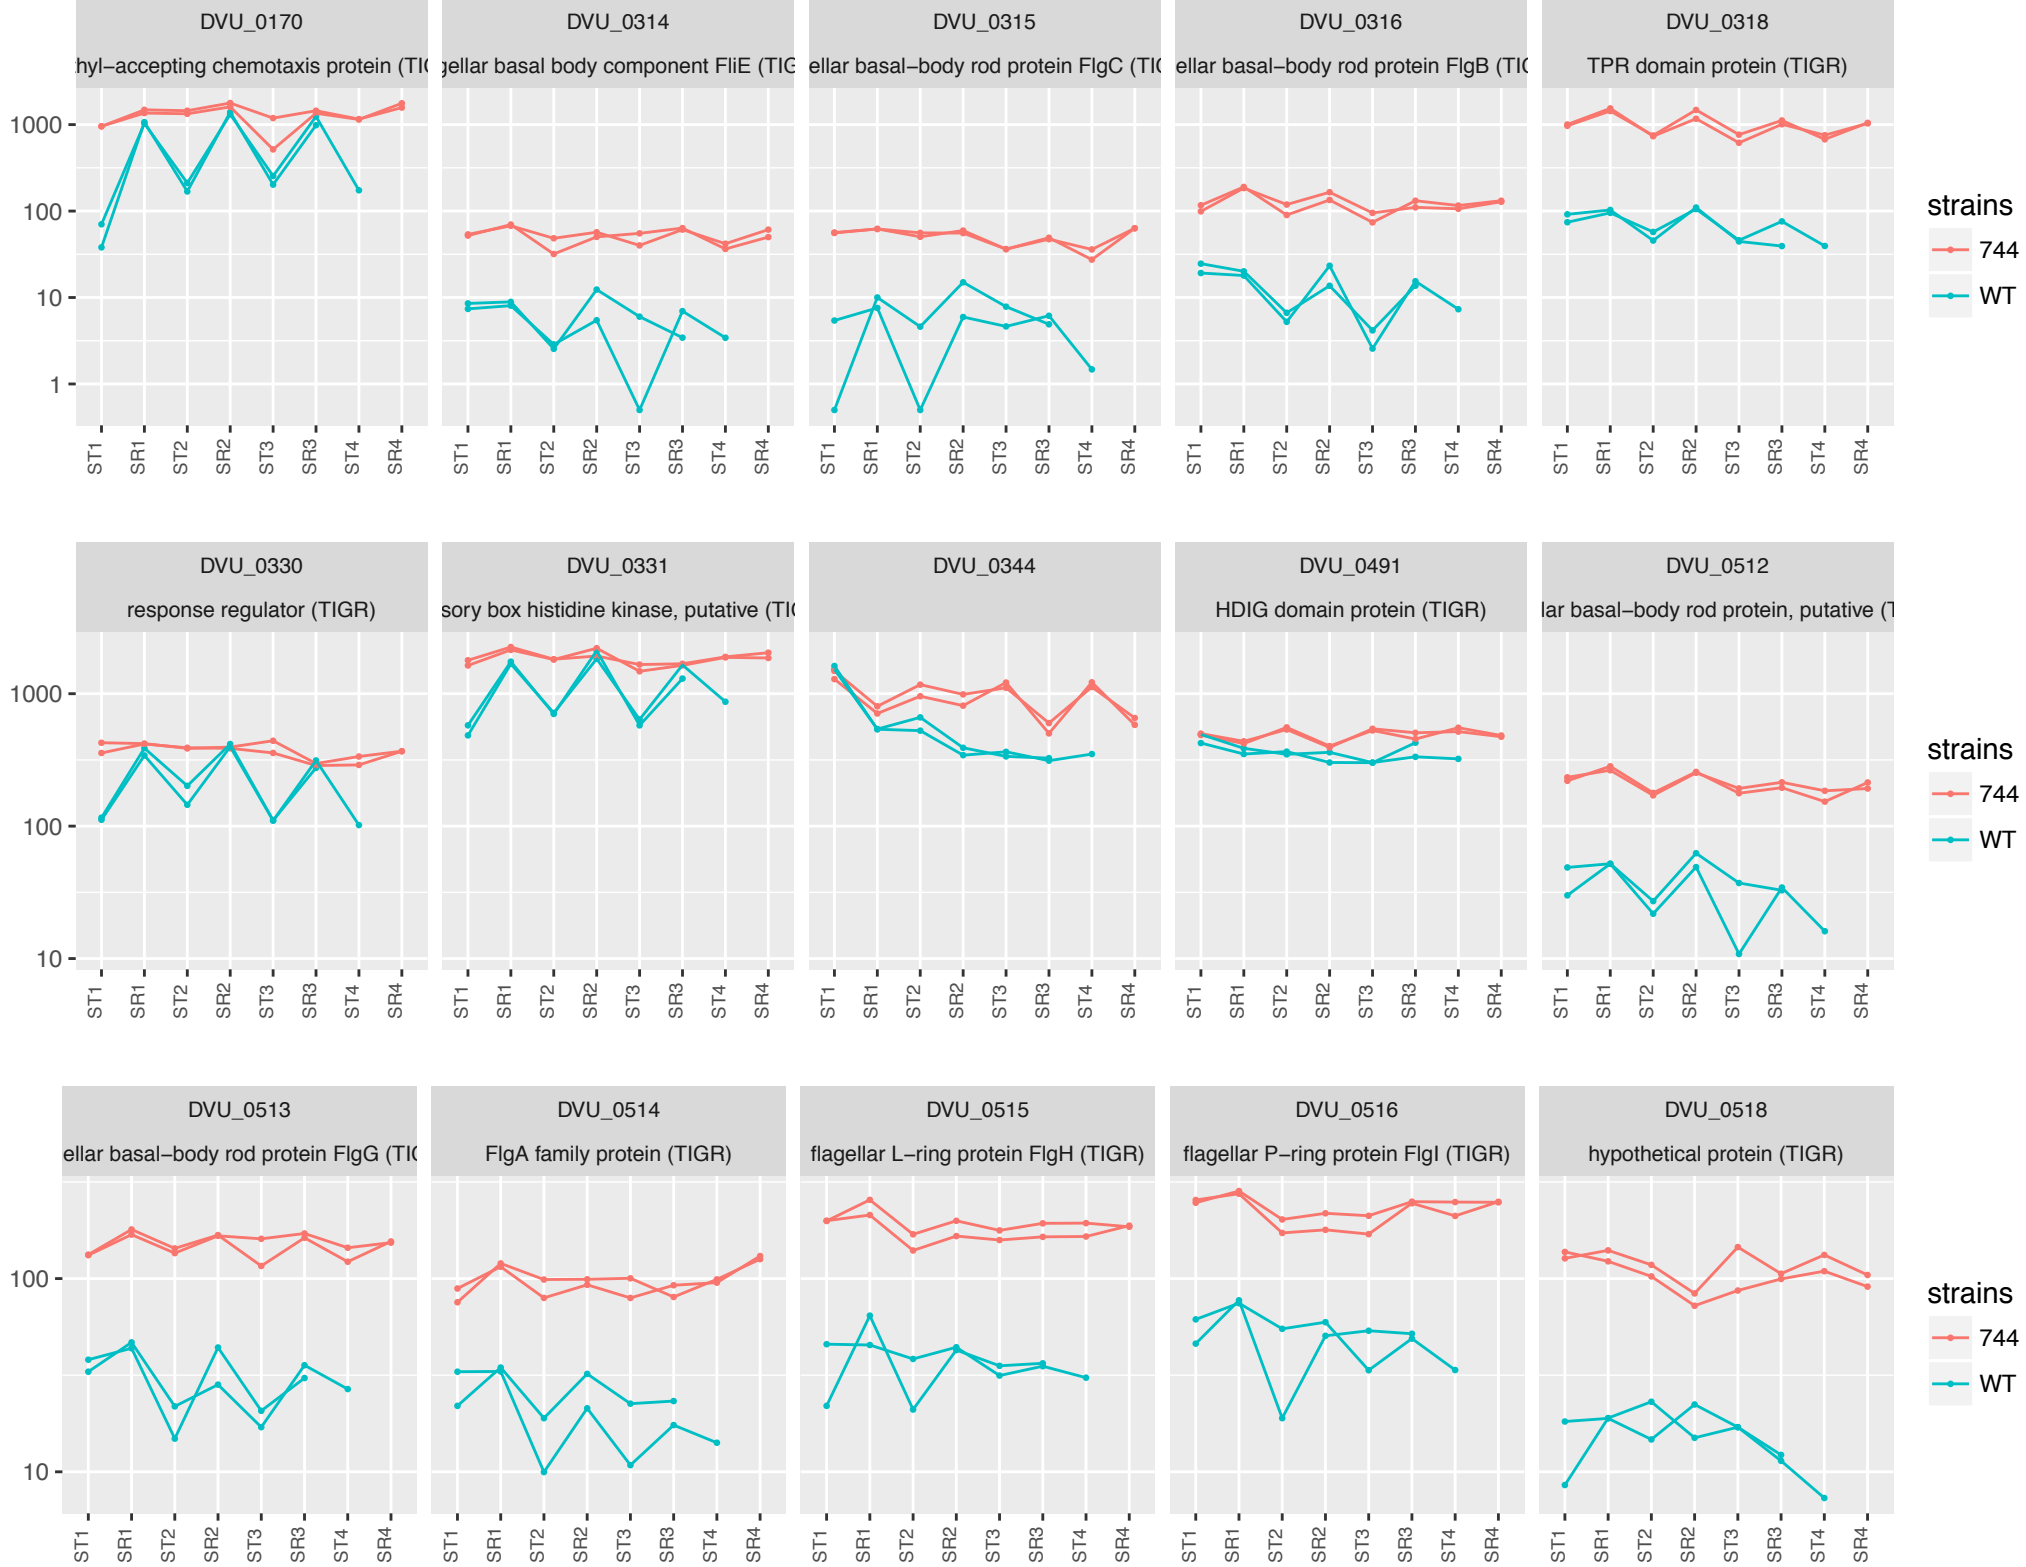

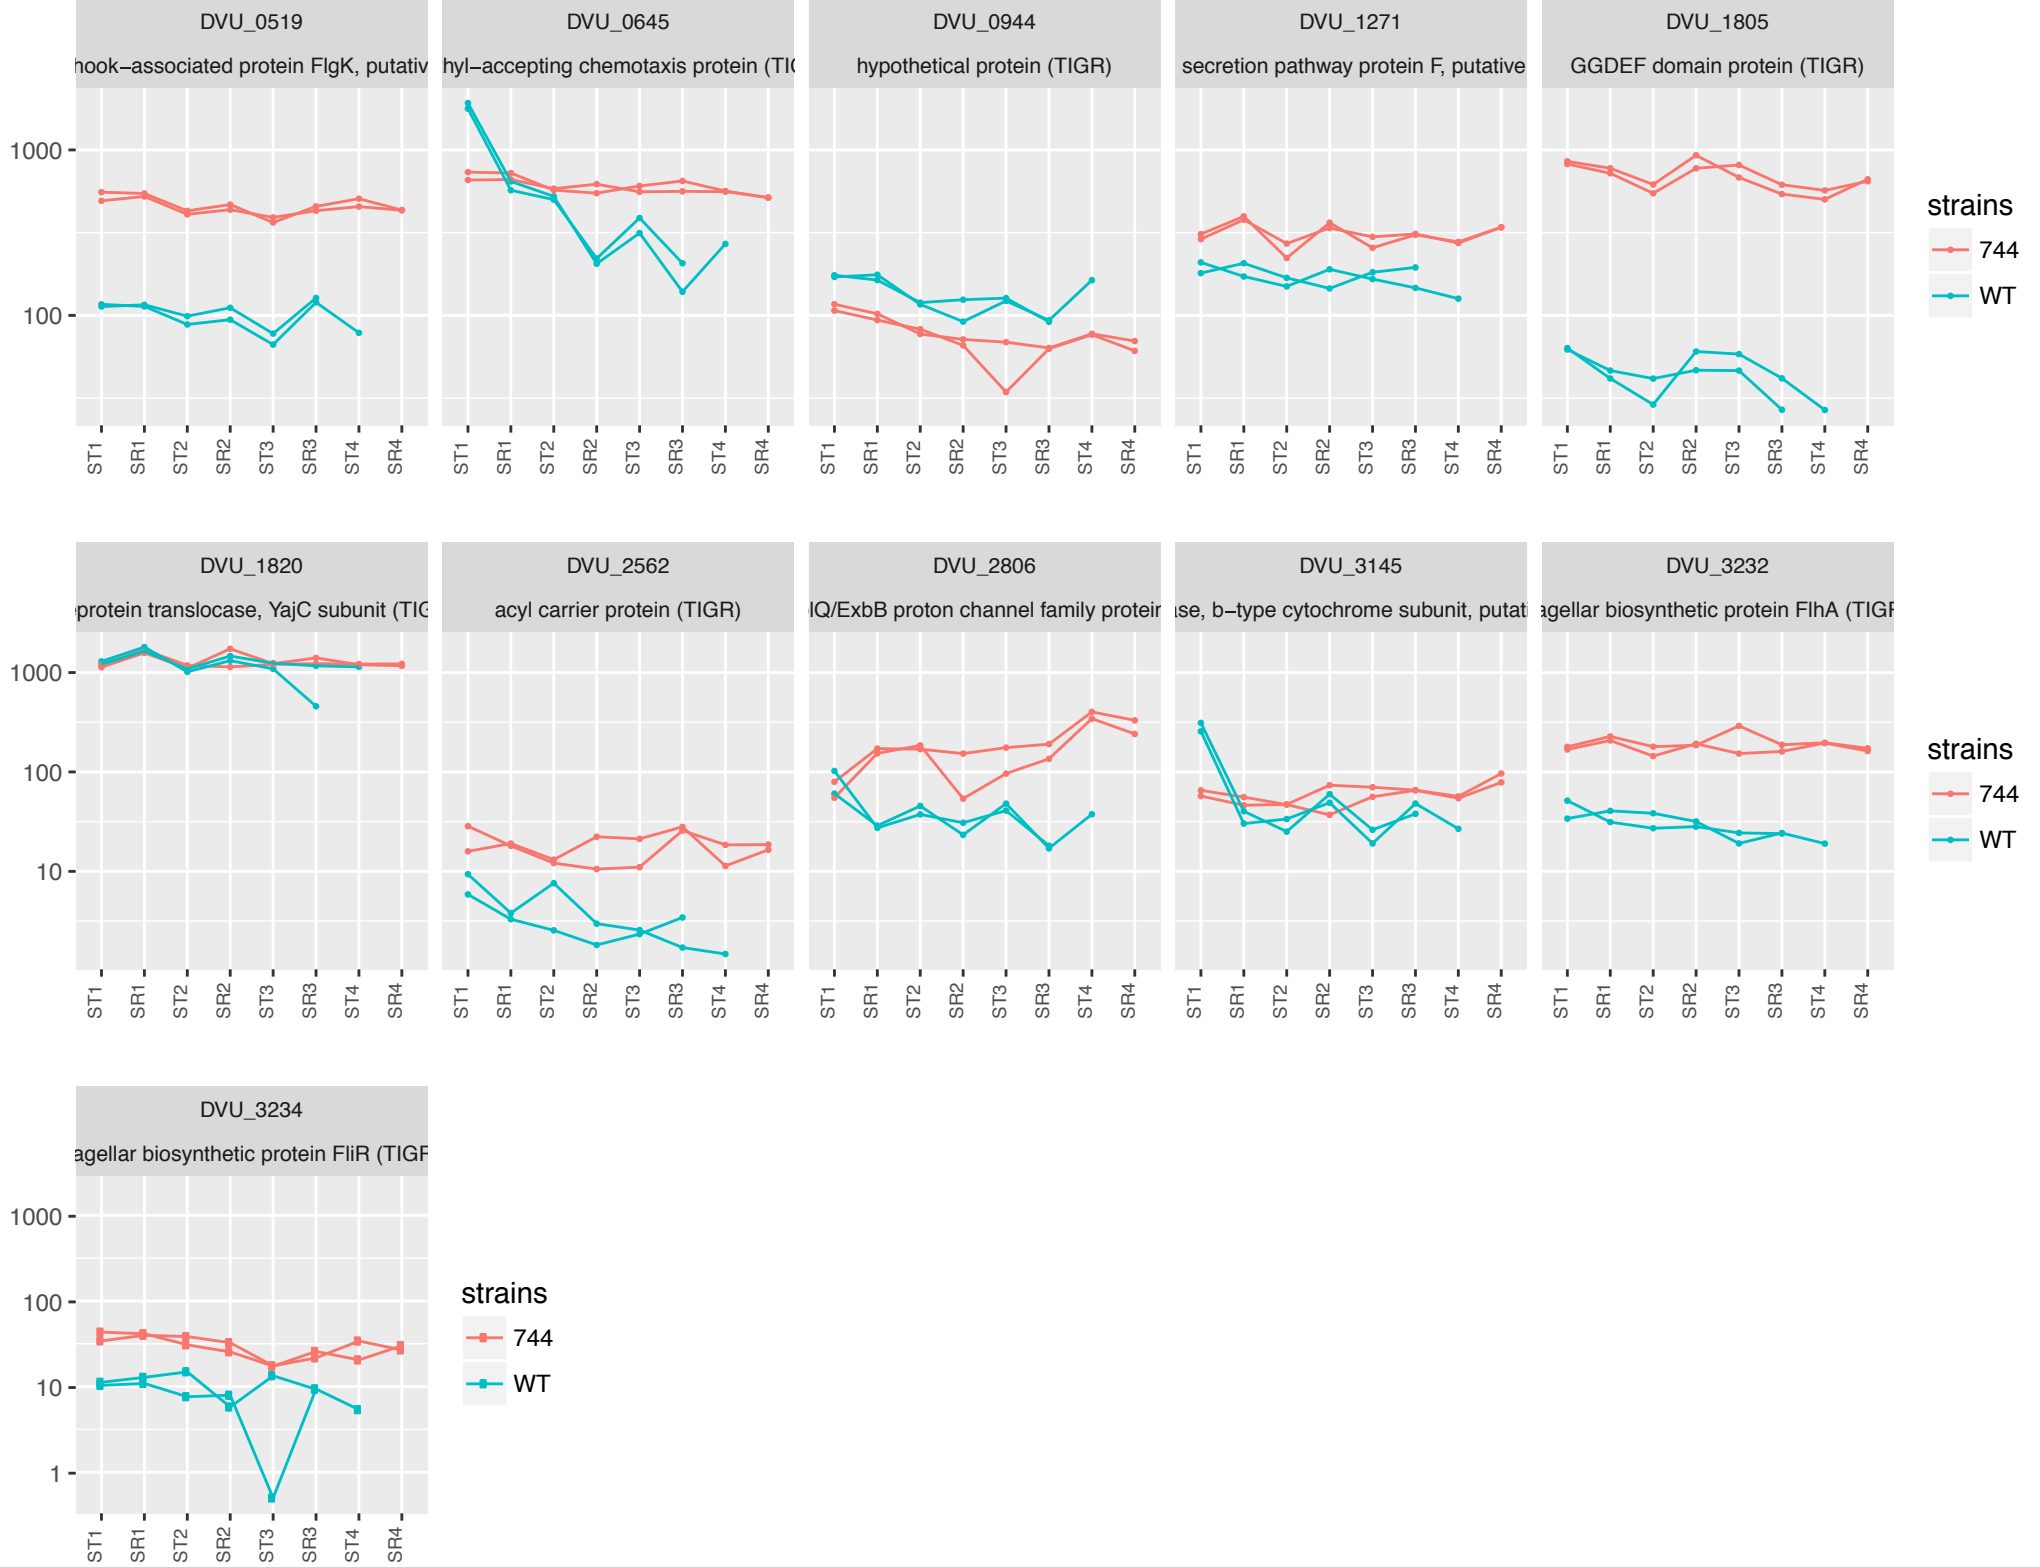

Fig S2

DVUA0091,  $\log_2FC=-4.22$ , \*

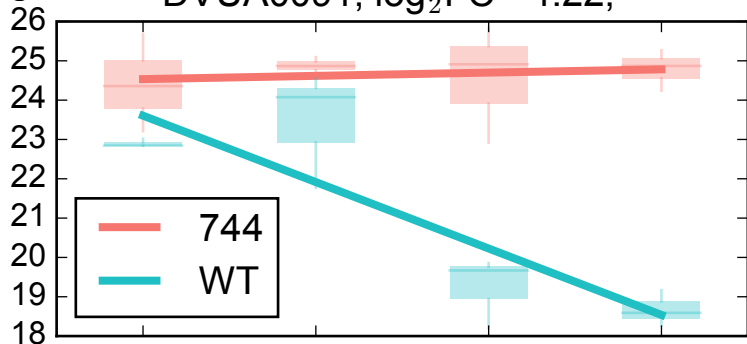

DVUA0132,  $\log_2FC=-3.18$ , \*

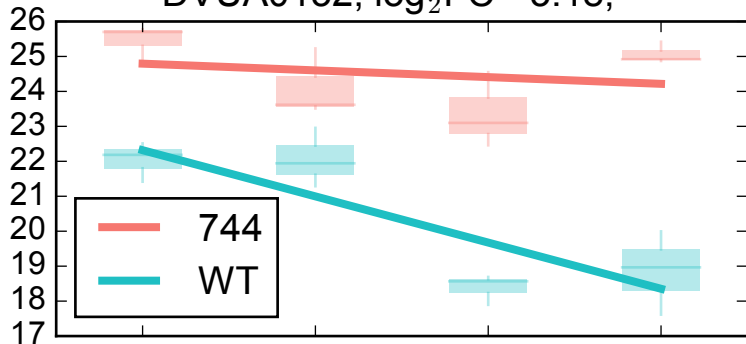

DVUA0131,  $\log_2FC=-2.69$ , \*\*

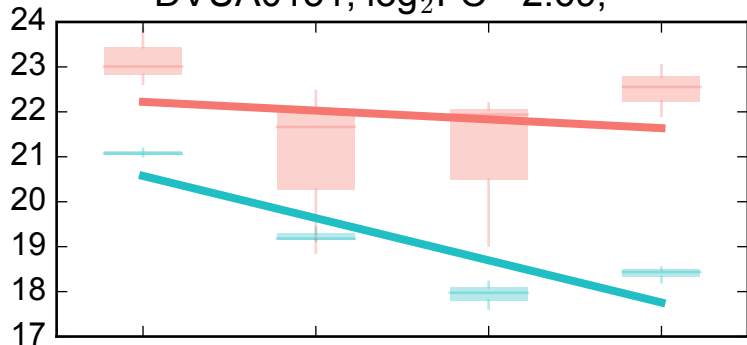

DVUA0108,  $\log_2FC=-3.03$ , \*\*

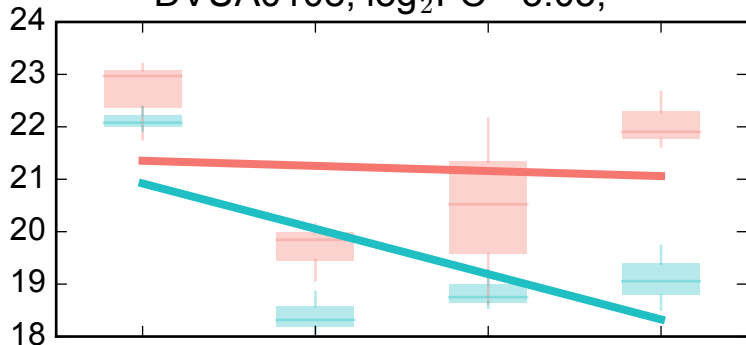

DVU3042,  $\log_2FC=-2.67$ , \*

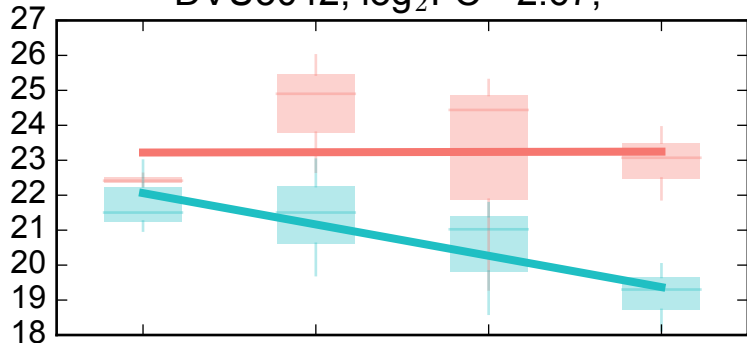

DVU1852,  $\log_2FC=-2.63$ , \*

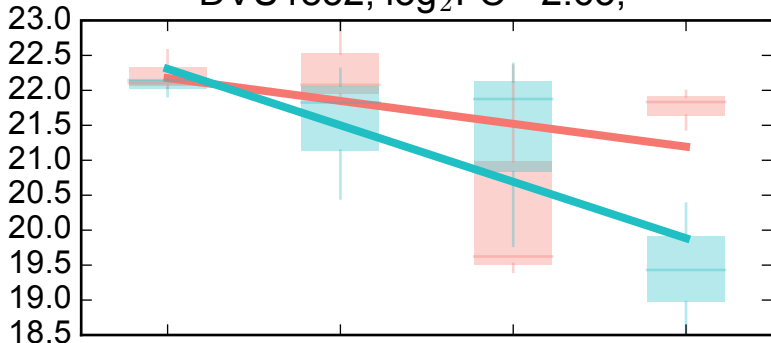

DVU0614,  $\log_2FC=-2.14$ , \*

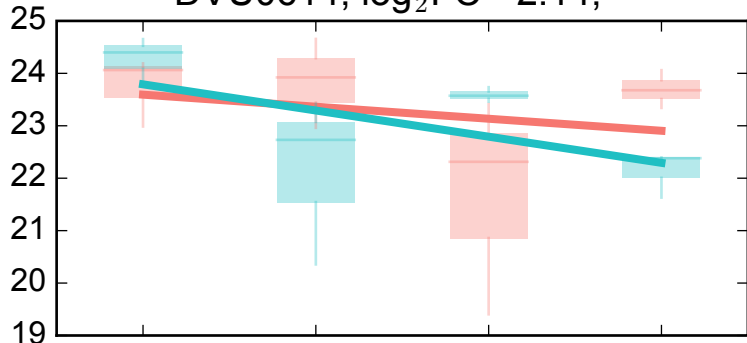

DVU2342,  $\log_2FC=-2.01$ , \*\*

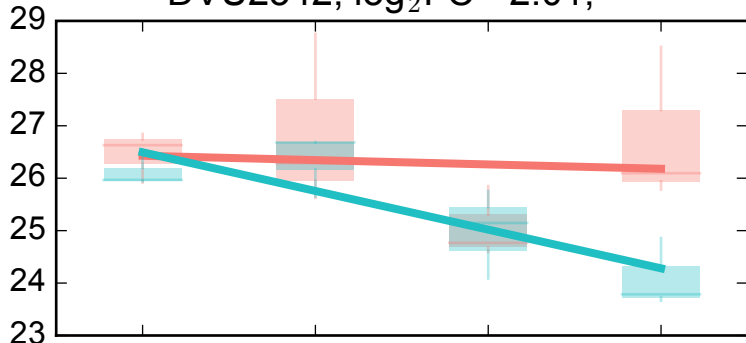

DVU0305,  $\log_2FC=-2.57$ , \*\*

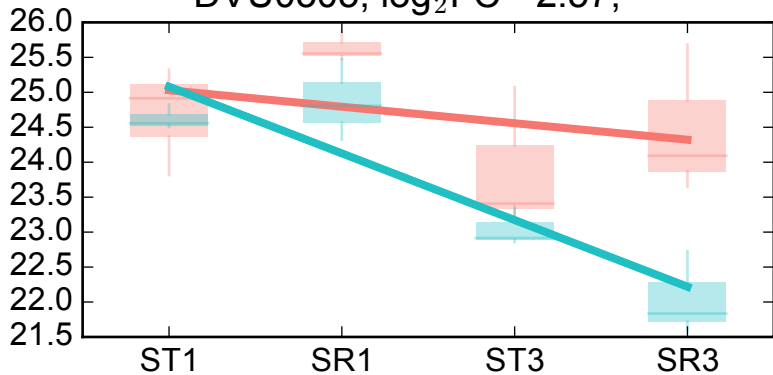

DVU2804,  $\log_2FC=-5.52$ , \*\*

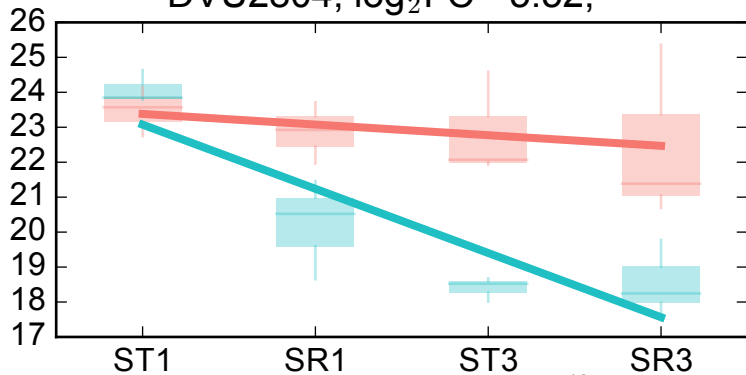

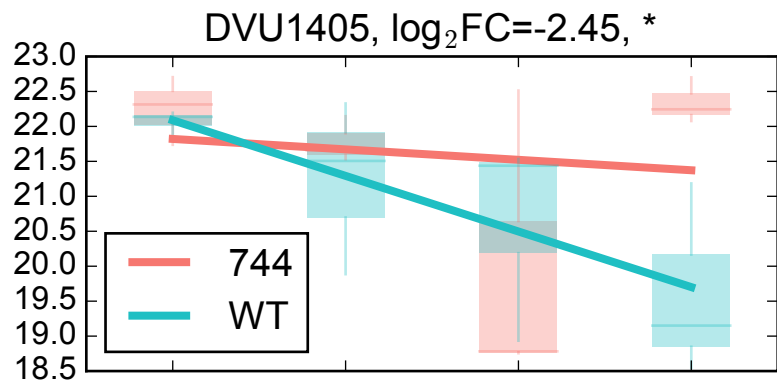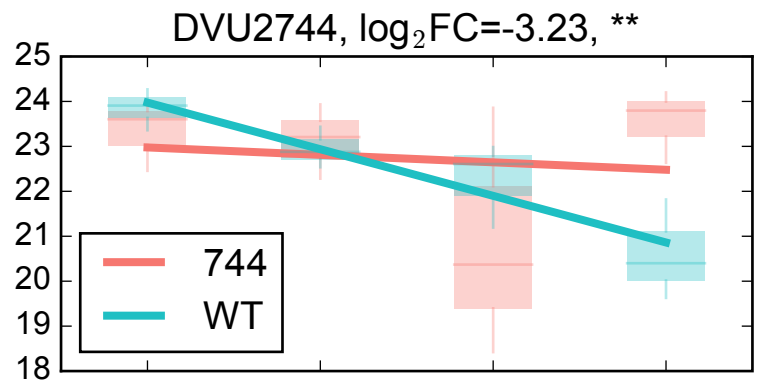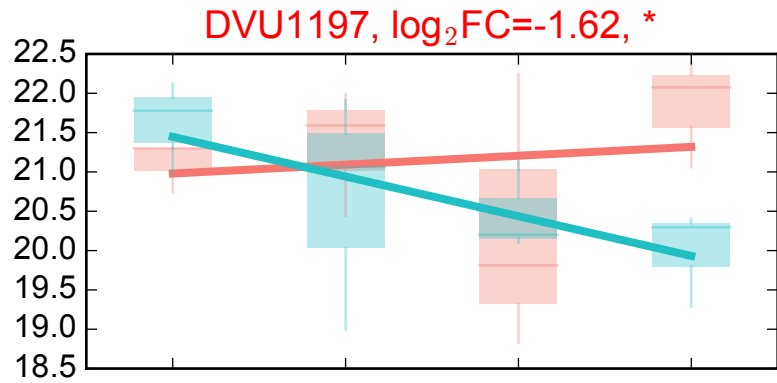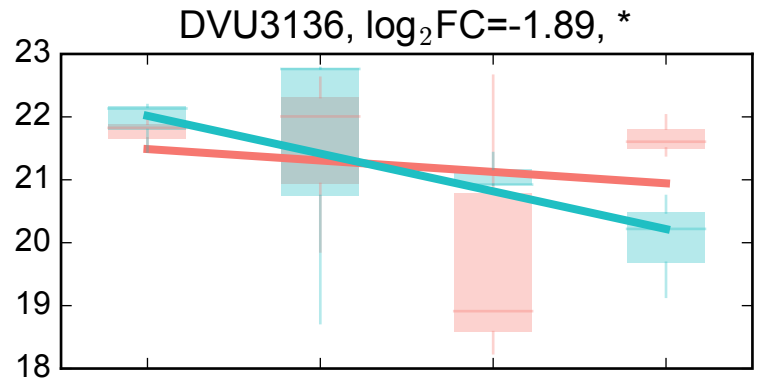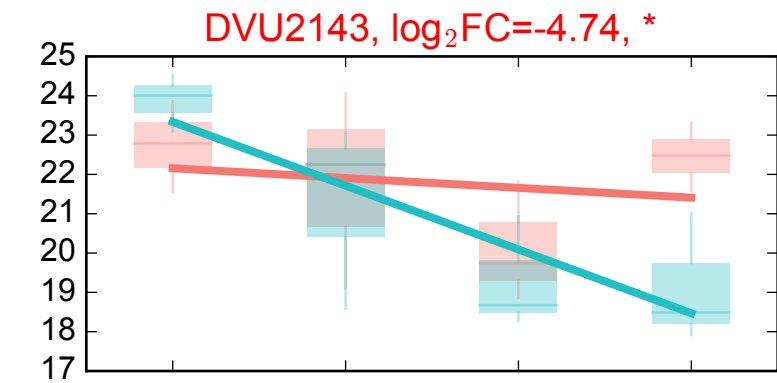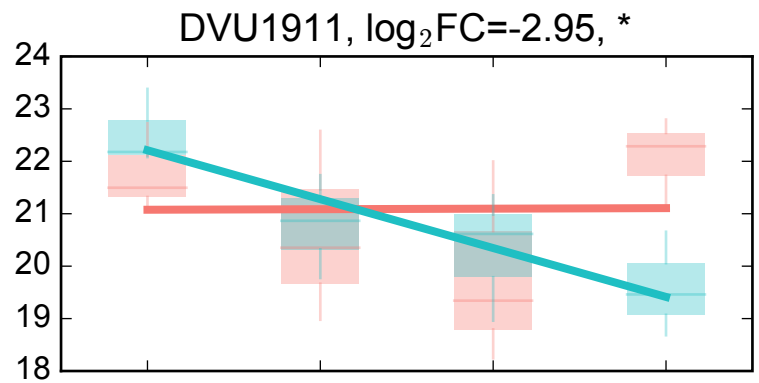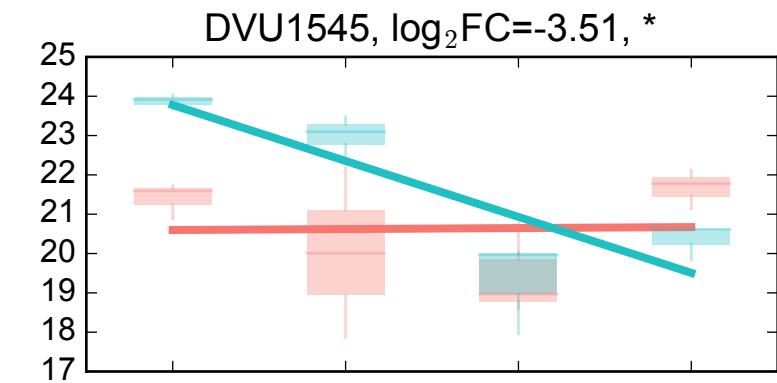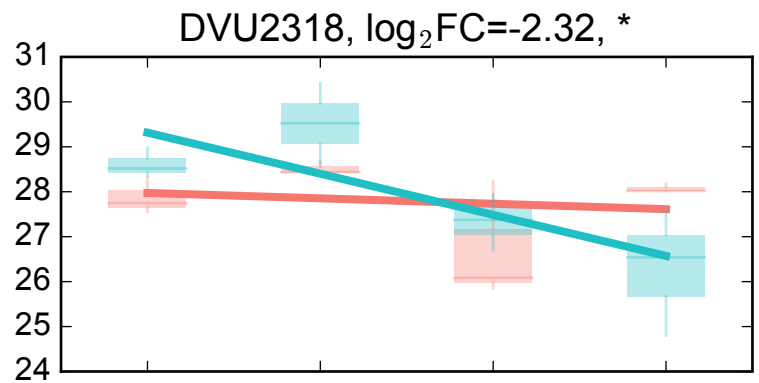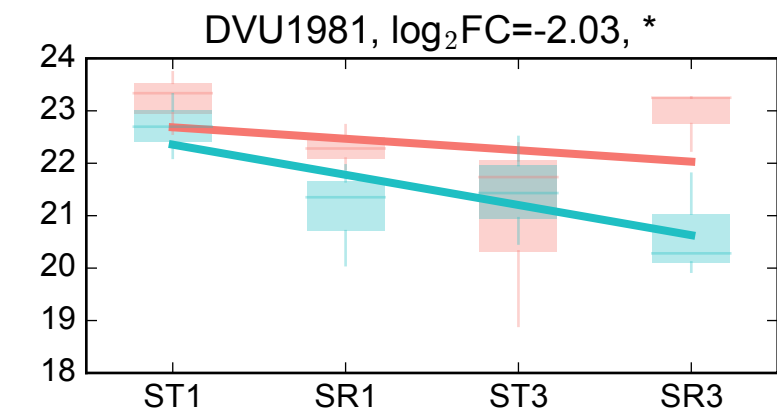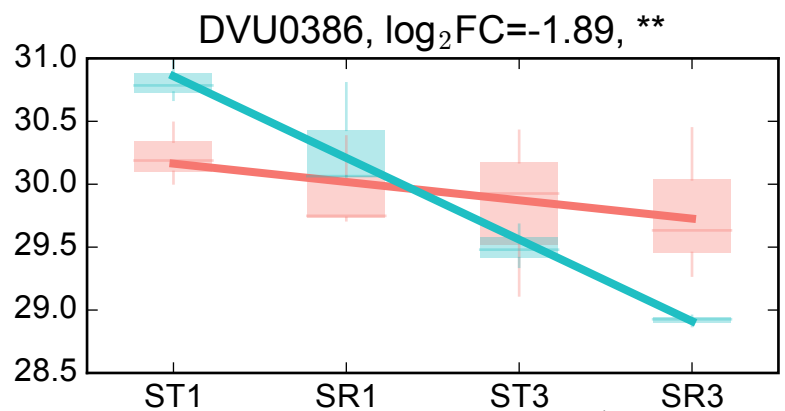

DVU1621,  $\log_2FC=-2.25$ , \*\*

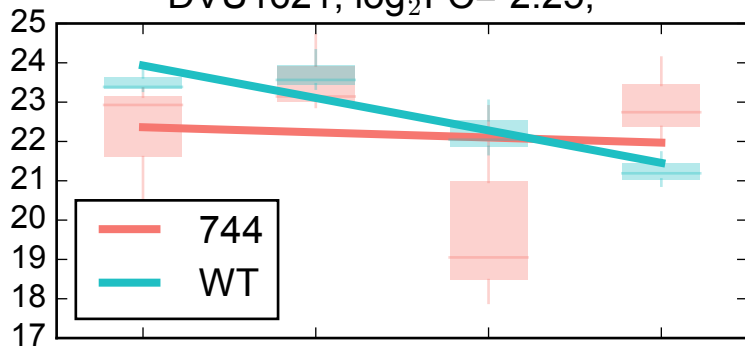

DVU1932,  $\log_2FC=-2.66$ , \*

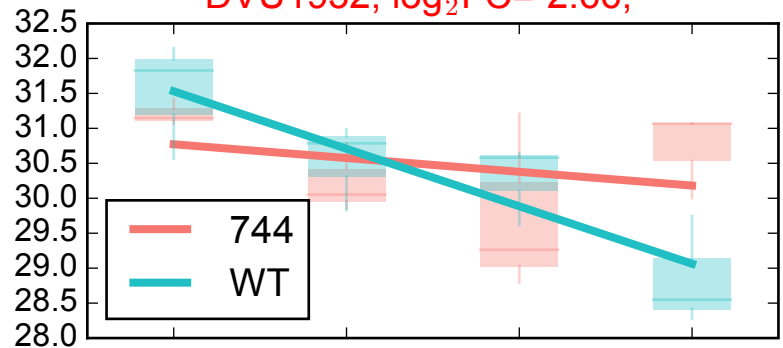

DVU0136,  $\log_2FC=-1.94$ , \*

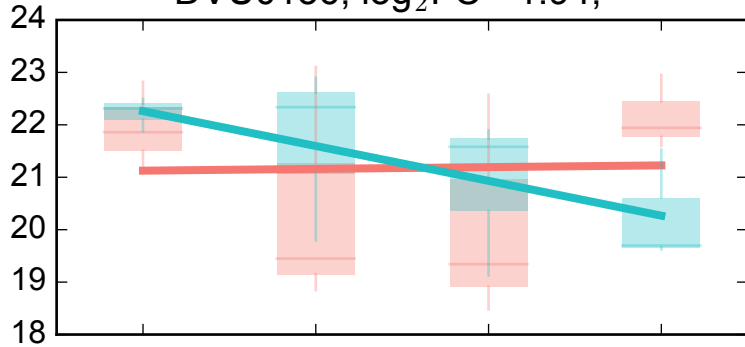

DVU2203,  $\log_2FC=-1.60$ , \*

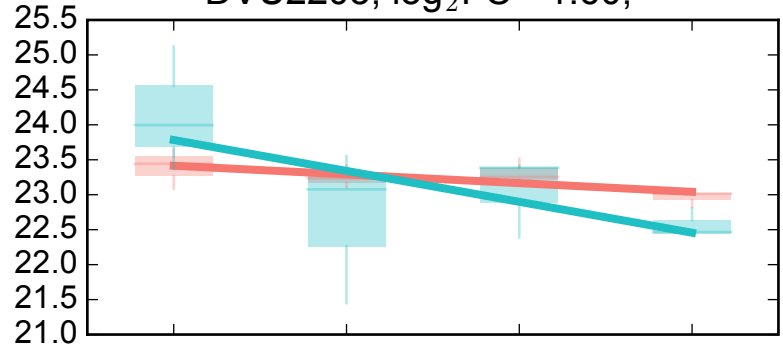

DVU0966,  $\log_2FC=-1.22$ , \*

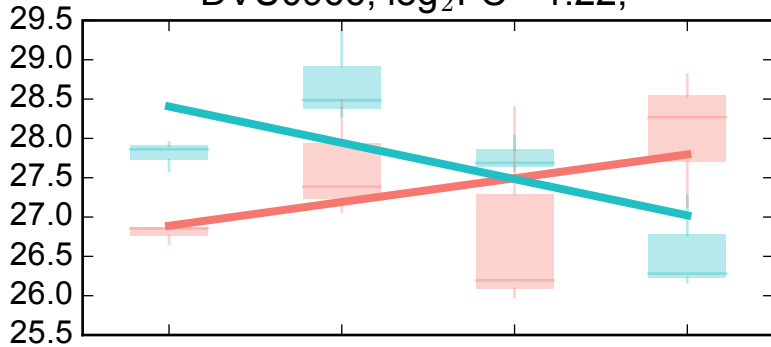

DVU2013,  $\log_2FC=-1.29$ , \*

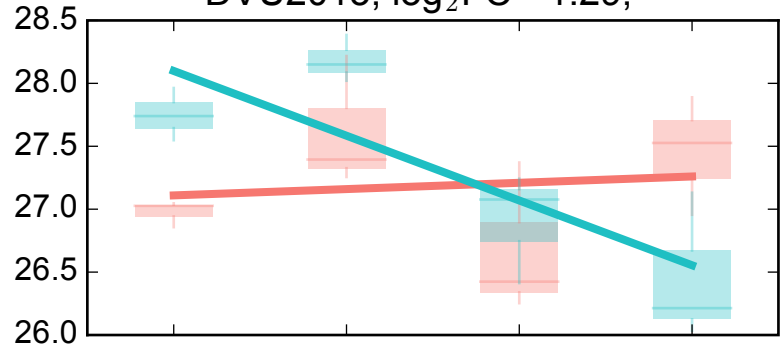

DVU0547,  $\log_2FC=-1.42$ , \*

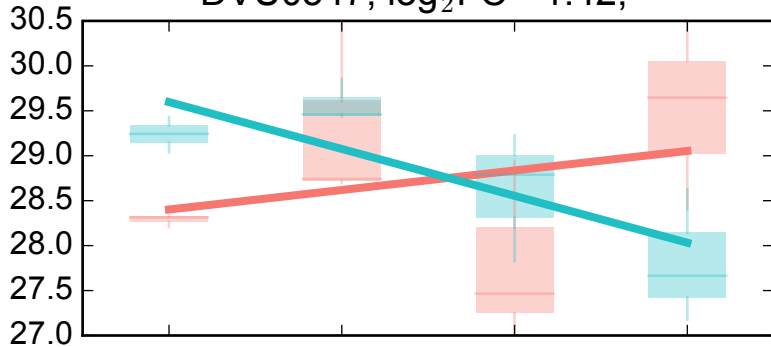

DVU0712,  $\log_2FC=-2.94$ , \*

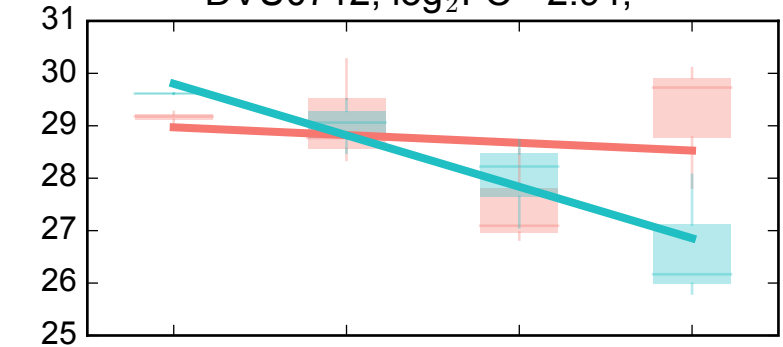

DVU0169,  $\log_2FC=-2.88$ , \*\*

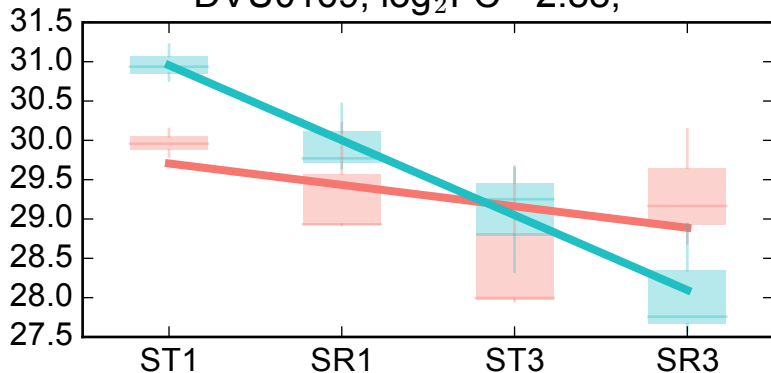

DVU1008,  $\log_2FC=-2.95$ , \*

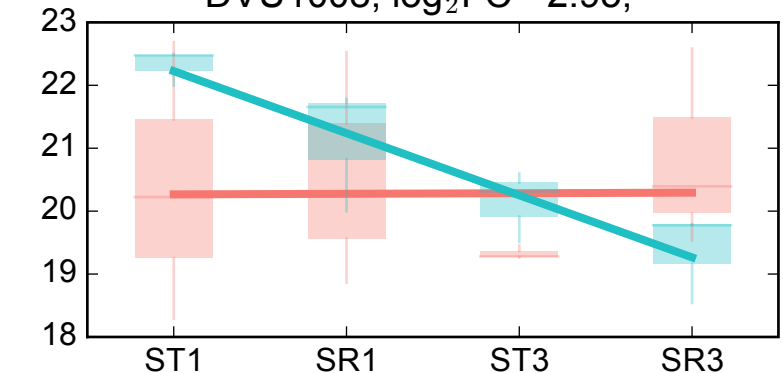

DVU3162,  $\log_2FC=-3.11$ , \*

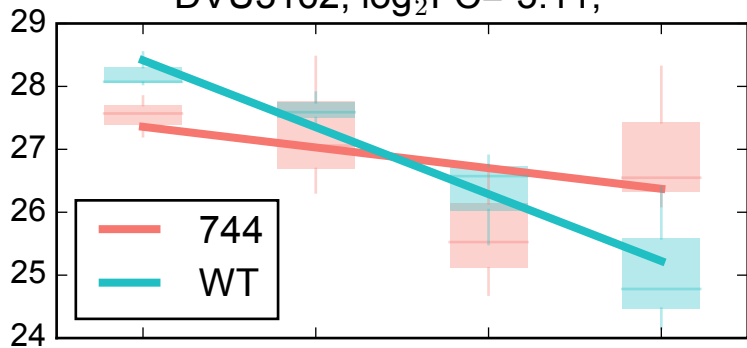

DVU0107,  $\log_2FC=-1.92$ , \*

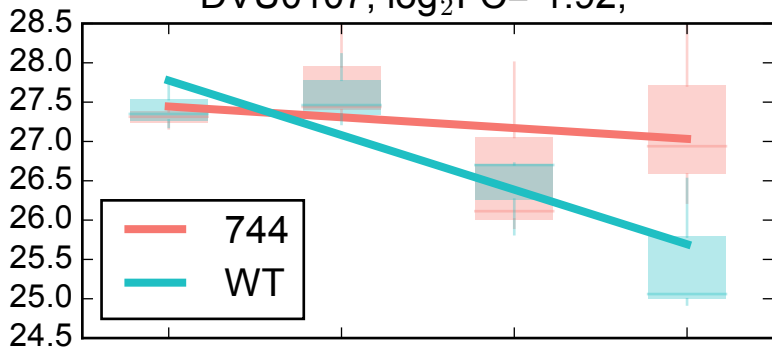

DVU1012,  $\log_2FC=-2.70$ , \*\*

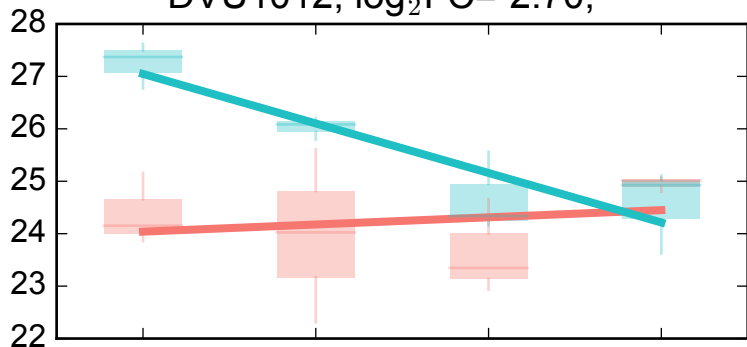

DVU0752,  $\log_2FC=-1.42$ , \*

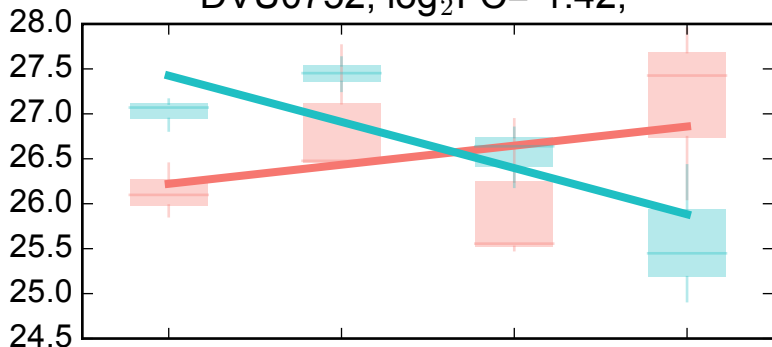

DVU1243,  $\log_2FC=-1.70$ , \*

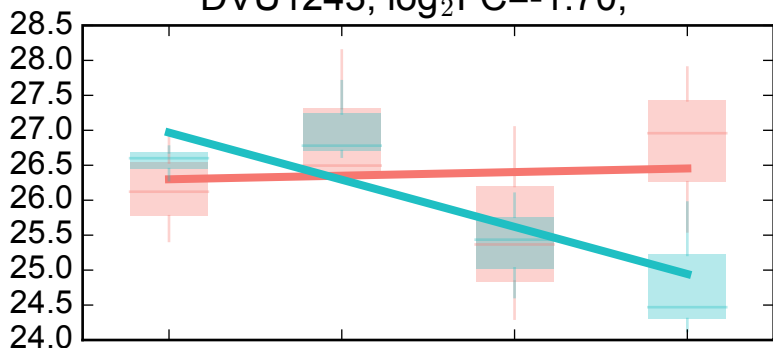

DVU1937,  $\log_2FC=-1.73$ , \*

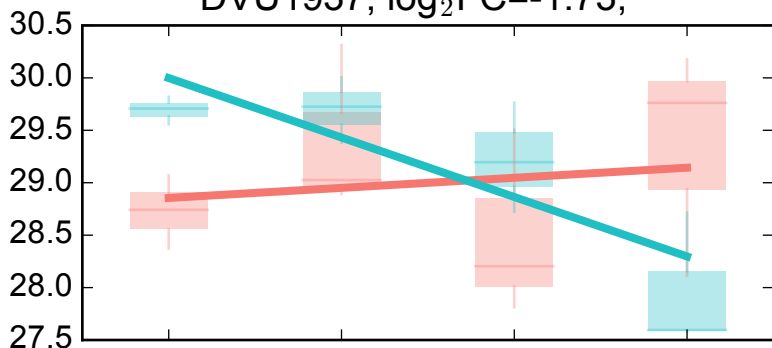

DVU3276,  $\log_2FC=-3.86$ , \*

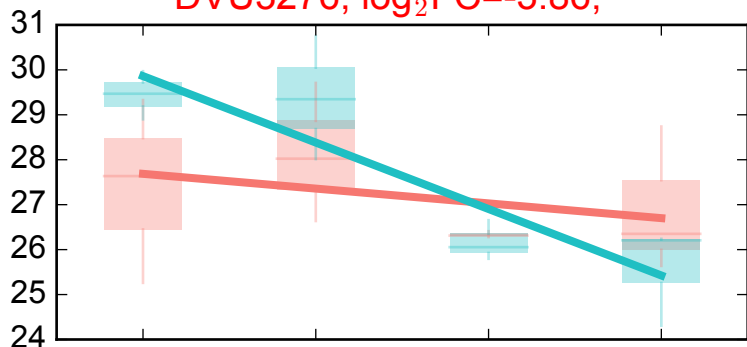

DVU0841,  $\log_2FC=-2.42$ , \*

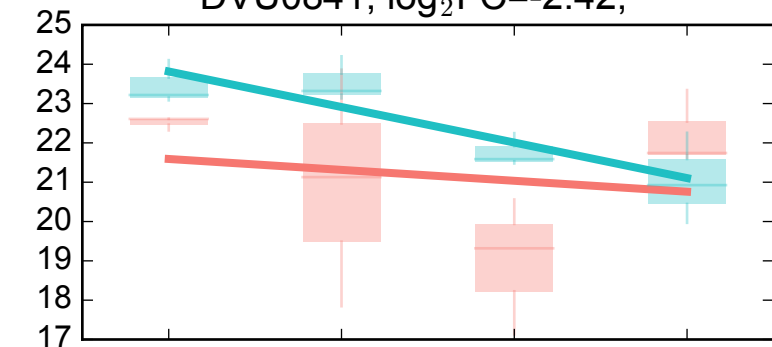

DVU2569,  $\log_2FC=-1.57$ , \*

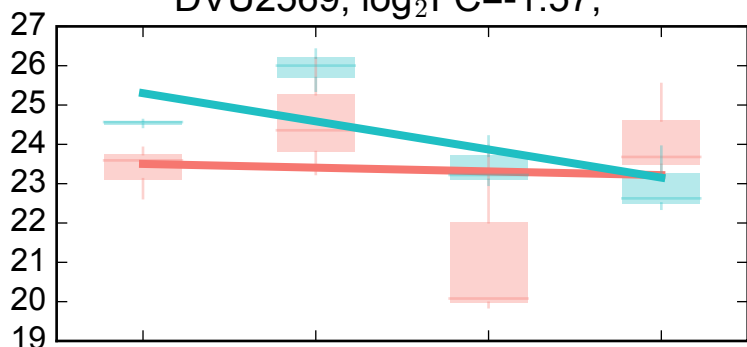

DVU2923,  $\log_2FC=-2.73$ , \*

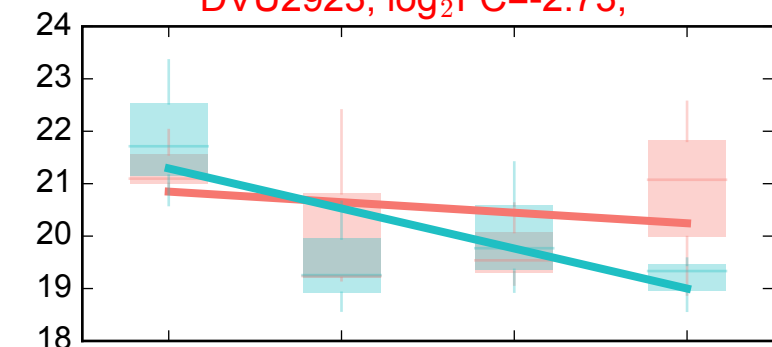



DVU0707,  $\log_2FC=-2.83$ , \*

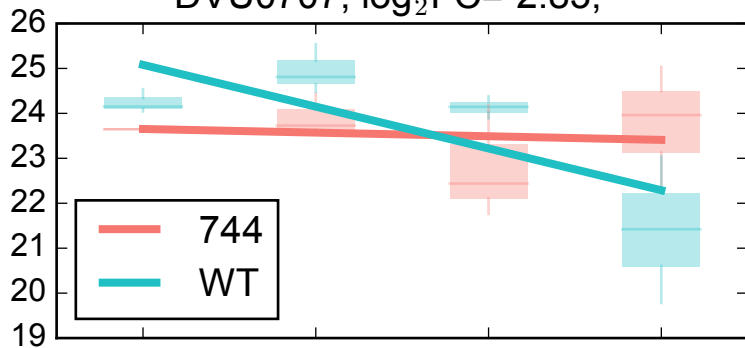

DVU2548,  $\log_2FC=-2.04$ , \*

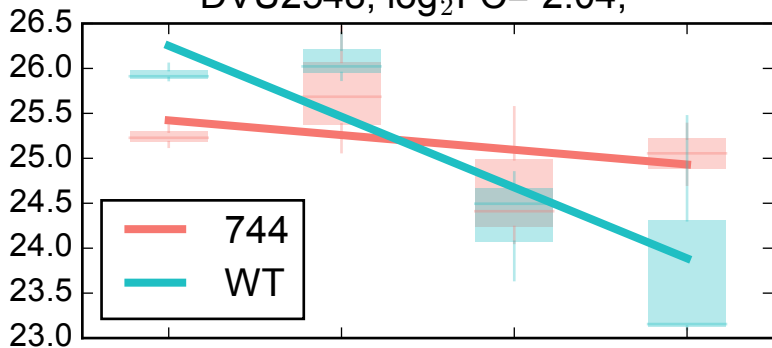

DVU0979,  $\log_2FC=-2.09$ , \*

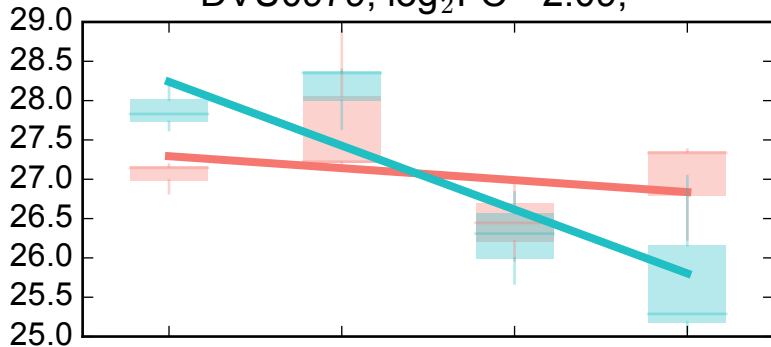

DVU3030,  $\log_2FC=-1.61$ , \*

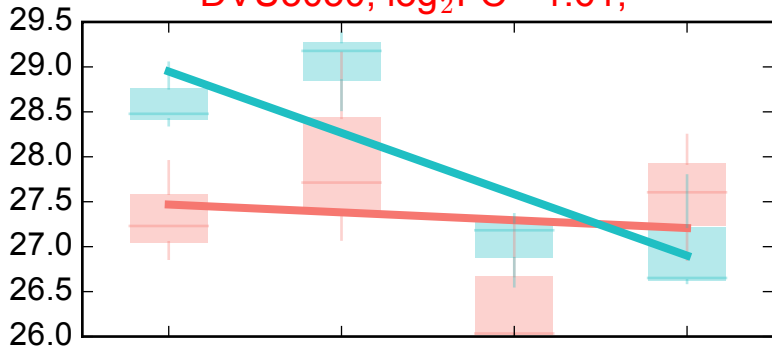

DVU2036,  $\log_2FC=-3.16$ , \*\*

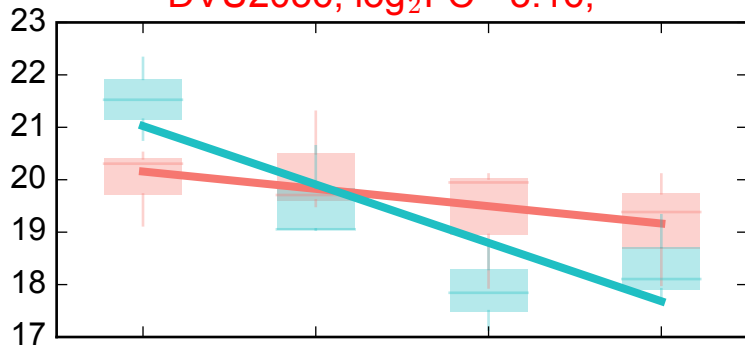

DVU0227,  $\log_2FC=-2.04$ , \*

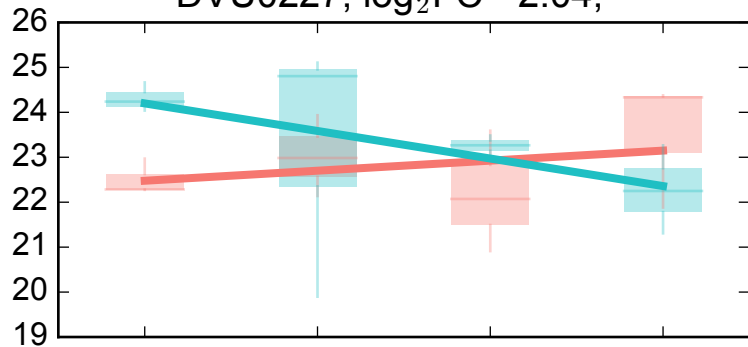

DVU0870,  $\log_2FC=-2.48$ , \*

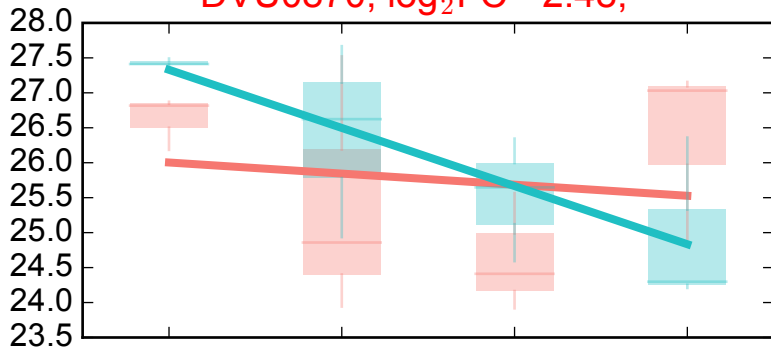

DVU0285,  $\log_2FC=-2.53$ , \*

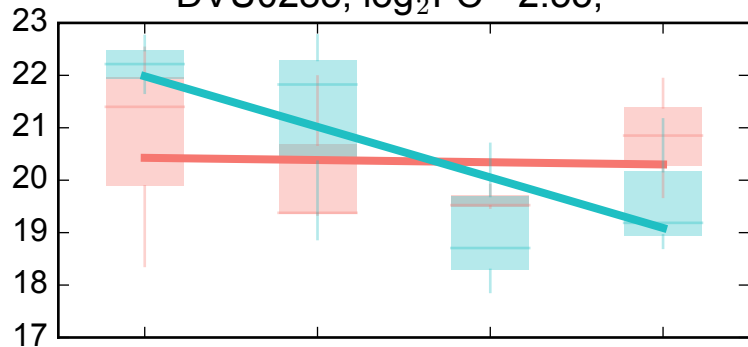

DVU0660,  $\log_2FC=-0.96$ , \*

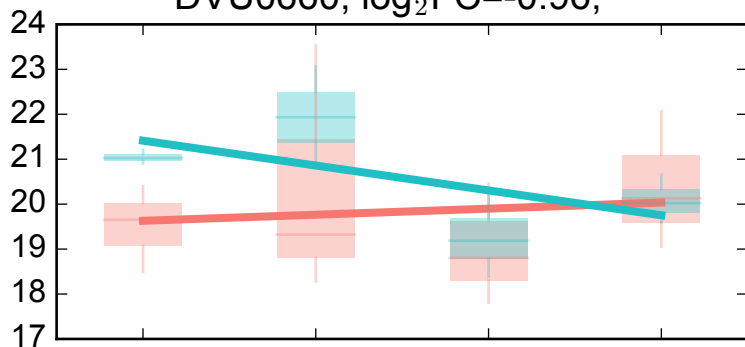

DVU3259,  $\log_2FC=-3.10$ , \*

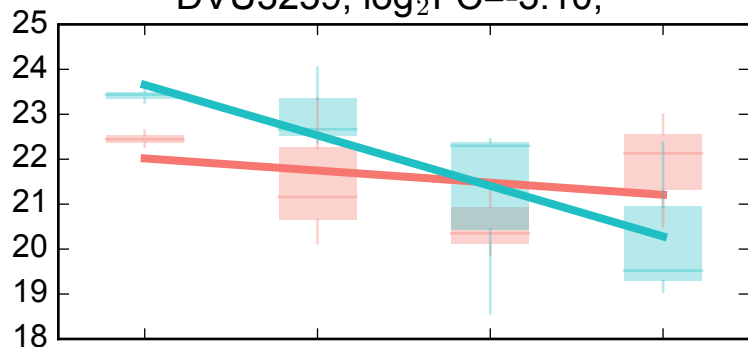

DVU1376,  $\log_2FC=-1.14$ , \*

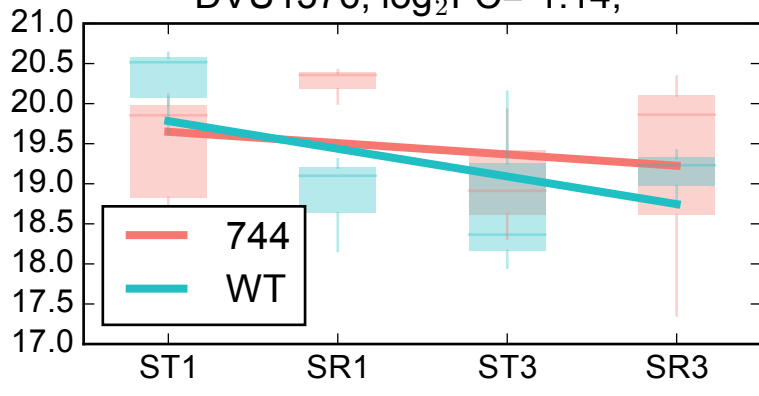

DVU0177,  $\log_2FC=-3.07$ , \*

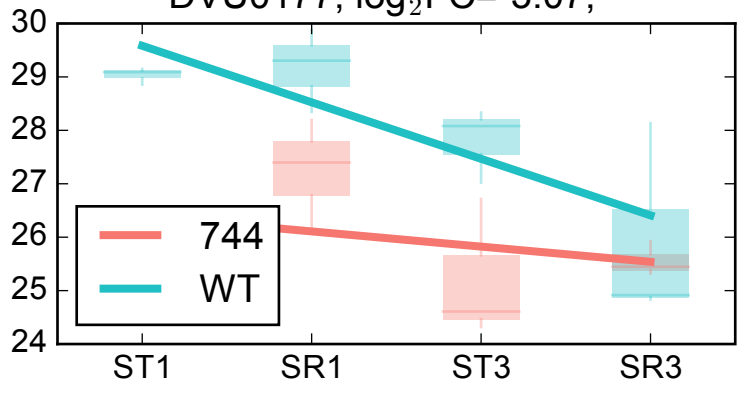

Supplement: MSB-13-919-s001.pdf [file MSB-13-919-s001.pdf]
